# Supplementary material for: Major Transcriptome Reprogramming Underlies Floral Mimicry Induced by the Rust Fungus Puccinia monoica in Boechera stricta
Source: PLoS One. 2013 Sep 17;8(9):e75293. doi: 10.1371/journal.pone.0075293 (PMC3775748; doi:10.1371/journal.pone.0075293)
Supplement: Table S2 — List of 910 significantly differentially expressed genes in uninfected Boechera stricta flowers. 'F': Boechera stricta uninfected flowers. 'SL': Boechera stricta uninfected stems and leaves. *False Discovery Rate (FDR) estimated using Rank Products (RP) to detect genes that are differentially expressed. Genes with RP FDR value < 0.05 are considered significant. (XLSX) [file pone.0075293.s002.xlsx]

## Sheet: Table S2
Gene ID	Description TAIR version10	Gene expression Log2 ('F'/'SL' )	RP FDR value* ('F' vs. 'SL')	Differential expression
At3g54340.1	AP3, ATAP3 | K-box region and MADS-box transcription factor family protein | chr3:20119428-20121087 REVERSE LENGTH=699	5.88825	0	Up-regulated
At3g27810.1	ATMYB21, ATMYB3, MYB21 | myb domain protein 21 | chr3:10307596-10310093 FORWARD LENGTH=681	5.74073	0	Up-regulated
At2g07560.1	AHA6, HA6 | H(+)-ATPase 6 | chr2:3170394-3173952 REVERSE LENGTH=2850	5.69466	0	Up-regulated
At3g15400.1	ATA20 | anther 20 | chr3:5201678-5202928 FORWARD LENGTH=1251	5.42833	0	Up-regulated
At1g24260.1	SEP3, AGL9 | K-box region and MADS-box transcription factor family protein | chr1:8593790-8595862 REVERSE LENGTH=753	5.41276	0	Up-regulated
At2g19070.1	SHT | spermidine hydroxycinnamoyl transferase | chr2:8260185-8261958 REVERSE LENGTH=1356	5.20828	0	Up-regulated
At5g07550.1	GRP19, ATGRP19 | glycine-rich protein 19 | chr5:2388574-2389184 REVERSE LENGTH=321	4.95648	2.85714e-05	Up-regulated
At1g61110.1	anac025, NAC025 | NAC domain containing protein 25 | chr1:22516730-22518055 FORWARD LENGTH=972	4.93303	0.000125	Up-regulated
At2g38110.1	ATGPAT6, GPAT6 | glycerol-3-phosphate acyltransferase 6 | chr2:15952816-15955364 REVERSE LENGTH=1506	4.79036	0.00012	Up-regulated
At3g28750.1	unknown protein; LOCATED IN: endomembrane system; EXPRESSED IN: 12 plant structures; EXPRESSED DURING: L mature pollen stage, M germinated pollen stage, 4 anthesis, C globular stage, petal differentiation and expansion stage; CONTAINS InterPro DOMAIN/s: Protein of unknown function DUF1216 (InterPro:IPR009605); BEST Arabidopsis thaliana protein match is: unknown protein (TAIR:AT5G39880.1); Has 37 …	4.72717	0.000133333	Up-regulated
At4g27560.1	UDP-Glycosyltransferase superfamily protein | chr4:13760114-13761481 REVERSE LENGTH=1368	4.6612	0.000216667	Up-regulated
At5g19580.1	glyoxal oxidase-related protein | chr5:6607595-6609517 REVERSE LENGTH=1785	4.56764	0.000236364	Up-regulated
At3g18590.1	ENODL5, AtENODL5 | early nodulin-like protein 5 | chr3:6398670-6399337 FORWARD LENGTH=567	4.46109	0.000266667	Up-regulated
At5g20240.1	PI | K-box region and MADS-box transcription factor family protein | chr5:6829203-6831208 FORWARD LENGTH=627	4.4568	0.000306667	Up-regulated
At5g07430.1	Pectin lyase-like superfamily protein | chr5:2352549-2354069 FORWARD LENGTH=1086	4.43949	0.000307692	Up-regulated
At3g05960.1	ATSTP6, STP6 | sugar transporter 6 | chr3:1783587-1785334 REVERSE LENGTH=1524	4.43577	0.000328571	Up-regulated
At5g07410.1	Pectin lyase-like superfamily protein | chr5:2345852-2347276 FORWARD LENGTH=1086	4.43273	0.0003	Up-regulated
At3g26140.1	Cellulase (glycosyl hydrolase family 5) protein | chr3:9559742-9563070 REVERSE LENGTH=1527	4.40284	0.000282353	Up-regulated
At5g07530.1	GRP17, ATGRP17, ATGRP-7 | glycine rich protein 17 | chr5:2382678-2384495 REVERSE LENGTH=1632	4.33508	0.000342857	Up-regulated
At2g20870.1	cell wall protein precursor, putative | chr2:8982239-8982661 REVERSE LENGTH=423	4.31363	0.000327273	Up-regulated
At5g45880.1	Pollen Ole e 1 allergen and extensin family protein | chr5:18609934-18611066 REVERSE LENGTH=525	4.29571	0.000284211	Up-regulated
At1g55560.1	sks14 | SKU5 similar 14 | chr1:20754474-20756527 REVERSE LENGTH=1650	4.29413	0.00029	Up-regulated
At1g51460.1	ABC-2 type transporter family protein | chr1:19077132-19081335 REVERSE LENGTH=2037	4.29193	0.000408333	Up-regulated
At3g11980.1	MS2, FAR2 | Jojoba acyl CoA reductase-related male sterility protein | chr3:3814484-3816927 FORWARD LENGTH=1851	4.27625	0.00033913	Up-regulated
At2g39060.1	SWEET9, AtSWEET9 | Nodulin MtN3 family protein | chr2:16306818-16308206 REVERSE LENGTH=777	4.19396	0.000457143	Up-regulated
At1g69120.1	AP1, AGL7 | K-box region and MADS-box transcription factor family protein | chr1:25982576-25986102 REVERSE LENGTH=771	4.17262	0.000416	Up-regulated
At3g62170.1	VGDH2 | VANGUARD 1 homolog 2 | chr3:23016495-23018337 REVERSE LENGTH=1767	4.16824	0.000461538	Up-regulated
At5g55720.1	Pectin lyase-like superfamily protein | chr5:22556047-22557496 FORWARD LENGTH=1179	4.1046	0.000466667	Up-regulated
At1g69180.1	CRC | Plant-specific transcription factor YABBY family protein | chr1:26007734-26008940 REVERSE LENGTH=546	4.03786	0.000813793	Up-regulated
At2g36190.1	AtcwINV4, cwINV4 | cell wall invertase 4 | chr2:15174951-15177785 REVERSE LENGTH=1776	3.98567	0.000846667	Up-regulated
At2g47040.1	VGD1 | Plant invertase/pectin methylesterase inhibitor superfamily | chr2:19328186-19330060 REVERSE LENGTH=1788	3.92523	0.00102581	Up-regulated
At1g75940.1	ATA27, BGLU20 | Glycosyl hydrolase superfamily protein | chr1:28511198-28514044 FORWARD LENGTH=1608	3.89883	0.00105455	Up-regulated
At5g60130.1	AP2/B3-like transcriptional factor family protein | chr5:24211871-24212958 REVERSE LENGTH=903	3.82681	0.00114118	Up-regulated
At4g18960.1	AG | K-box region and MADS-box transcription factor family protein | chr4:10383917-10388272 FORWARD LENGTH=759	3.79554	0.00121143	Up-regulated
At4g08670.1	Bifunctional inhibitor/lipid-transfer protein/seed storage 2S albumin superfamily protein | chr4:5536765-5538210 REVERSE LENGTH=627	3.78783	0.00116757	Up-regulated
At3g01270.1	Pectate lyase family protein | chr3:82892-84720 REVERSE LENGTH=1428	3.78495	0.00103125	Up-regulated
At4g29700.1	Alkaline-phosphatase-like family protein | chr4:14543739-14545124 REVERSE LENGTH=1386	3.73148	0.00136	Up-regulated
At3g13390.1	sks11 | SKU5 similar 11 | chr3:4351401-4353289 REVERSE LENGTH=1665	3.72592	0.00121579	Up-regulated
At1g02190.2	Fatty acid hydroxylase superfamily | chr1:415154-417796 FORWARD LENGTH=1872	3.71481	0.00138974	Up-regulated
At1g47980.1	unknown protein; FUNCTIONS IN: molecular_function unknown; INVOLVED IN: biological_process unknown; LOCATED IN: endomembrane system; EXPRESSED IN: 6 plant structures; EXPRESSED DURING: 4 anthesis, F mature embryo stage, petal differentiation and expansion stage, E expanded cotyledon stage; BEST Arabidopsis thaliana protein match is: unknown protein (TAIR:AT3G62730.1); Has 169 Blast hits to 169 pr…	3.68311	0.00138182	Up-regulated
At3g28820.1	Protein of unknown function (DUF1216) | chr3:10827714-10829396 FORWARD LENGTH=1305	3.67436	0.00142857	Up-regulated
At1g75790.1	sks18 | SKU5 similar 18 | chr1:28454980-28457388 REVERSE LENGTH=1638	3.67374	0.00134043	Up-regulated
At5g59090.1	ATSBT4.12, SBT4.12 | subtilase 4.12 | chr5:23852125-23855235 REVERSE LENGTH=2211	3.67053	0.00133913	Up-regulated
At3g01530.1	ATMYB57, MYB57 | myb domain protein 57 | chr3:210352-211151 REVERSE LENGTH=621	3.65465	0.0013875	Up-regulated
At4g35010.1	BGAL11 | beta-galactosidase 11 | chr4:16668075-16671974 REVERSE LENGTH=2538	3.62709	0.0012	Up-regulated
At2g47050.1	Plant invertase/pectin methylesterase inhibitor superfamily protein | chr2:19331927-19332577 REVERSE LENGTH=651	3.62236	0.00140465	Up-regulated
At1g75930.1	EXL6 | extracellular lipase 6 | chr1:28508109-28509708 FORWARD LENGTH=1032	3.6108	0.00141176	Up-regulated
At5g48140.1	Pectin lyase-like superfamily protein | chr5:19518907-19520412 REVERSE LENGTH=1188	3.58832	0.00135122	Up-regulated
At5g12000.1	Protein kinase protein with adenine nucleotide alpha hydrolases-like domain | chr5:3874151-3876780 REVERSE LENGTH=2106	3.58283	0.00135918	Up-regulated
At4g14815.1	Bifunctional inhibitor/lipid-transfer protein/seed storage 2S albumin superfamily protein | chr4:8505122-8505760 FORWARD LENGTH=471	3.57686	0.00162308	Up-regulated
At3g60570.1	ATEXPB5, EXPB5, ATHEXP BETA 1.3 | expansin B5 | chr3:22391247-22392463 FORWARD LENGTH=759	3.52671	0.00135111	Up-regulated
At4g16590.1	ATCSLA01, CSLA01, ATCSLA1 | cellulose synthase-like A01 | chr4:9345757-9349039 FORWARD LENGTH=1206	3.50005	0.00186316	Up-regulated
At4g30140.1	CDEF1 | GDSL-like Lipase/Acylhydrolase superfamily protein | chr4:14738603-14740548 REVERSE LENGTH=1047	3.49422	0.00178148	Up-regulated
At3g62710.1	Glycosyl hydrolase family protein | chr3:23197739-23200559 REVERSE LENGTH=1953	3.48235	0.001416	Up-regulated
At3g42640.1	AHA8, HA8 | H(+)-ATPase 8 | chr3:14724309-14728062 FORWARD LENGTH=2847	3.48222	0.00166415	Up-regulated
At4g08895.1	inorganic phosphate transporter family protein | chr4:5697896-5698615 FORWARD LENGTH=468	3.45916	0.00187586	Up-regulated
At3g47340.1	ASN1, DIN6, AT-ASN1 | glutamine-dependent asparagine synthase 1 | chr3:17438136-17441043 REVERSE LENGTH=1755	3.45526	0.00186429	Up-regulated
At3g28790.1	Protein of unknown function (DUF1216) | chr3:10813577-10815588 REVERSE LENGTH=1827	3.44506	0.00181667	Up-regulated
At3g07820.1	Pectin lyase-like superfamily protein | chr3:2496597-2498028 REVERSE LENGTH=1176	3.42086	0.00189508	Up-regulated
At1g14420.1	AT59 | Pectate lyase family protein | chr1:4931844-4933405 REVERSE LENGTH=1380	3.4199	0.00176364	Up-regulated
At1g11600.1	CYP77B1 | cytochrome P450, family 77, subfamily B, polypeptide 1 | chr1:3902090-3903622 FORWARD LENGTH=1533	3.41418	0.00184407	Up-regulated
At5g08030.1	PLC-like phosphodiesterases superfamily protein | chr5:2575152-2576770 REVERSE LENGTH=1119	3.41184	0.00193968	Up-regulated
At2g26450.1	Plant invertase/pectin methylesterase inhibitor superfamily | chr2:11251279-11253446 FORWARD LENGTH=1845	3.39355	0.00195484	Up-regulated
At5g24910.1	CYP714A1 | cytochrome P450, family 714, subfamily A, polypeptide 1 | chr5:8567674-8570260 REVERSE LENGTH=1599	3.39292	0.00212923	Up-regulated
At3g28830.1	Protein of unknown function (DUF1216) | chr3:10831233-10833020 FORWARD LENGTH=1620	3.36351	0.00195625	Up-regulated
At2g13570.1	NF-YB7 | nuclear factor Y, subunit B7 | chr2:5655842-5656489 REVERSE LENGTH=648	3.35338	0.00214328	Up-regulated
At5g47500.1	Pectin lyase-like superfamily protein | chr5:19271262-19272845 REVERSE LENGTH=1089	3.31754	0.00228451	Up-regulated
At2g47030.1	VGDH1 | Plant invertase/pectin methylesterase inhibitor superfamily | chr2:19324415-19326268 REVERSE LENGTH=1767	3.31722	0.00215758	Up-regulated
At1g80660.1	AHA9, HA9 | H(+)-ATPase 9 | chr1:30316227-30319948 REVERSE LENGTH=2865	3.28985	0.00233333	Up-regulated
At5g65690.1	PCK2, PEPCK | phosphoenolpyruvate carboxykinase 2 | chr5:26266477-26269486 FORWARD LENGTH=2013	3.28878	0.00236111	Up-regulated
At2g33850.1	unknown protein; FUNCTIONS IN: molecular_function unknown; INVOLVED IN: biological_process unknown; LOCATED IN: endomembrane system; EXPRESSED IN: 17 plant structures; EXPRESSED DURING: 9 growth stages; BEST Arabidopsis thaliana protein match is: unknown protein (TAIR:AT1G28400.1); Has 3053 Blast hits to 2119 proteins in 133 species: Archae - 6; Bacteria - 52; Metazoa - 135; Fungi - 96; Plants - …	3.28061	0.002488	Up-regulated
At3g13400.1	sks13 | SKU5 similar 13 | chr3:4355257-4357305 FORWARD LENGTH=1656	3.25136	0.0023	Up-regulated
At1g07340.1	ATSTP2, STP2 | sugar transporter 2 | chr1:2254873-2256712 FORWARD LENGTH=1497	3.25095	0.0025359	Up-regulated
At2g31500.1	CPK24 | calcium-dependent protein kinase 24 | chr2:13414016-13416324 FORWARD LENGTH=1749	3.2497	0.00231765	Up-regulated
At2g03850.1	Late embryogenesis abundant protein (LEA) family protein | chr2:1175653-1176597 FORWARD LENGTH=576	3.24936	0.00251233	Up-regulated
At2g23170.1	GH3.3 | Auxin-responsive GH3 family protein | chr2:9864125-9866502 REVERSE LENGTH=1788	3.24934	0.00247895	Up-regulated
At1g06260.1	Cysteine proteinases superfamily protein | chr1:1916449-1917585 FORWARD LENGTH=1032	3.23397	0.00252468	Up-regulated
At5g24790.1	Protein of unknown function, DUF599 | chr5:8512076-8513064 FORWARD LENGTH=741	3.20931	0.00260253	Up-regulated
At5g59120.1	ATSBT4.13, SBT4.13 | subtilase 4.13 | chr5:23864897-23868020 REVERSE LENGTH=2199	3.20697	0.0026225	Up-regulated
At2g45190.1	AFO, FIL, YAB1 | Plant-specific transcription factor YABBY family protein | chr2:18628450-18630552 REVERSE LENGTH=690	3.20676	0.0026122	Up-regulated
At4g15620.1	Uncharacterised protein family (UPF0497) | chr4:8913935-8915531 FORWARD LENGTH=573	3.18948	0.00264444	Up-regulated
At1g28130.1	GH3.17 | Auxin-responsive GH3 family protein | chr1:9825431-9827883 FORWARD LENGTH=1830	3.1785	0.00265783	Up-regulated
At2g16730.1	BGAL13 | glycosyl hydrolase family 35 protein | chr2:7261986-7266105 REVERSE LENGTH=2547	3.14959	0.00250541	Up-regulated
At5g40350.1	MYB24, AtMYB24 | myb domain protein 24 | chr5:16138703-16140946 REVERSE LENGTH=645	3.12546	0.00291667	Up-regulated
At1g33430.1	Galactosyltransferase family protein | chr1:12124438-12126052 REVERSE LENGTH=1188	3.10658	0.00307356	Up-regulated
At4g34850.1	LAP5 | Chalcone and stilbene synthase family protein | chr4:16608349-16609720 FORWARD LENGTH=1179	3.09984	0.00297907	Up-regulated
At1g71770.1	PAB5 | poly(A)-binding protein 5 | chr1:26990777-26993489 REVERSE LENGTH=2049	3.08561	0.00308409	Up-regulated
At1g24620.1	EF hand calcium-binding protein family | chr1:8723893-8724453 REVERSE LENGTH=561	3.06012	0.00292	Up-regulated
At5g19600.1	SULTR3;5 | sulfate transporter 3;5 | chr5:6613113-6616891 REVERSE LENGTH=1905	3.05931	0.00316404	Up-regulated
At1g50310.1	ATSTP9, STP9 | sugar transporter 9 | chr1:18635984-18638110 FORWARD LENGTH=1554	3.0384	0.00329111	Up-regulated
At2g40850.1	ATPI4K GAMMA 1, PI4K GAMMA 1 | phosphoinositide 4-kinase gamma 1 | chr2:17051575-17053260 FORWARD LENGTH=1686	2.96536	0.0035087	Up-regulated
At5g39400.1	ATPTEN1, PTEN1 | Calcium/lipid-binding (CaLB) phosphatase | chr5:15766251-15767922 FORWARD LENGTH=1239	2.95672	0.00344835	Up-regulated
At2g28630.1	KCS12 | 3-ketoacyl-CoA synthase 12 | chr2:12275719-12277149 REVERSE LENGTH=1431	2.95316	0.00393404	Up-regulated
At3g58780.1	SHP1, AGL1 | K-box region and MADS-box transcription factor family protein | chr3:21739150-21741766 FORWARD LENGTH=747	2.95154	0.00389474	Up-regulated
At3g28810.1	Protein of unknown function (DUF1216) | chr3:10822471-10823941 REVERSE LENGTH=1305	2.93499	0.0039625	Up-regulated
At4g14080.1	MEE48 | O-Glycosyl hydrolases family 17 protein | chr4:8118697-8120292 REVERSE LENGTH=1437	2.91697	0.00395054	Up-regulated
At2g45800.1	GATA type zinc finger transcription factor family protein | chr2:18858153-18859007 REVERSE LENGTH=681	2.91619	0.00395258	Up-regulated
At5g28237.1	Pyridoxal-5'-phosphate-dependent enzyme family protein | chr5:10207477-10213542 REVERSE LENGTH=1398	2.90706	0.004006	Up-regulated
At2g44460.1	BGLU28 | beta glucosidase 28 | chr2:18346500-18349826 FORWARD LENGTH=1749	2.88934	0.00399796	Up-regulated
At4g11760.1	LCR17 | low-molecular-weight cysteine-rich 17 | chr4:7079326-7080134 FORWARD LENGTH=291	2.88917	0.00401616	Up-regulated
At1g65880.1	BZO1 | benzoyloxyglucosinolate 1 | chr1:24508633-24510737 REVERSE LENGTH=1743	2.859	0.00418812	Up-regulated
At2g30090.1	Acyl-CoA N-acyltransferases (NAT) superfamily protein | chr2:12843583-12845597 REVERSE LENGTH=1161	2.85132	0.00465437	Up-regulated
At5g52360.1	ADF10 | actin depolymerizing factor 10 | chr5:21258157-21259229 REVERSE LENGTH=414	2.83759	0.00462549	Up-regulated
At3g43860.1	AtGH9A4, GH9A4 | glycosyl hydrolase 9A4 | chr3:15707183-15709438 FORWARD LENGTH=1461	2.82032	0.00476346	Up-regulated
At3g14380.1	Uncharacterised protein family (UPF0497) | chr3:4803175-4803799 REVERSE LENGTH=537	2.80335	0.00492264	Up-regulated
At2g19980.1	CAP (Cysteine-rich secretory proteins, Antigen 5, and Pathogenesis-related 1 protein) superfamily protein | chr2:8627699-8628220 REVERSE LENGTH=498	2.78614	0.00533514	Up-regulated
At3g15270.1	SPL5 | squamosa promoter binding protein-like 5 | chr3:5140624-5141256 REVERSE LENGTH=546	2.78048	0.00521682	Up-regulated
At2g42840.2	NA	2.76662	0.00478286	Up-regulated
At4g27570.1	UDP-Glycosyltransferase superfamily protein | chr4:13763657-13765018 REVERSE LENGTH=1362	2.75243	0.00533704	Up-regulated
At1g74540.1	CYP98A8 | cytochrome P450, family 98, subfamily A, polypeptide 8 | chr1:28013362-28014855 FORWARD LENGTH=1494	2.75035	0.00530826	Up-regulated
At3g01980.2	NAD(P)-binding Rossmann-fold superfamily protein | chr3:328075-328833 REVERSE LENGTH=636	2.73415	0.00562832	Up-regulated
At2g16910.1	AMS | basic helix-loop-helix (bHLH) DNA-binding superfamily protein | chr2:7331721-7334077 FORWARD LENGTH=1716	2.7329	0.00536364	Up-regulated
At3g17060.1	Pectin lyase-like superfamily protein | chr3:5816953-5818458 REVERSE LENGTH=1035	2.72932	0.005525	Up-regulated
At1g20130.1	GDSL-like Lipase/Acylhydrolase superfamily protein | chr1:6977939-6980003 FORWARD LENGTH=1605	2.71253	0.00575263	Up-regulated
At1g66850.1	Bifunctional inhibitor/lipid-transfer protein/seed storage 2S albumin superfamily protein | chr1:24936985-24937293 FORWARD LENGTH=309	2.70407	0.00574435	Up-regulated
At2g13350.1	Calcium-dependent lipid-binding (CaLB domain) family protein | chr2:5536525-5537730 REVERSE LENGTH=1206	2.70284	0.00580172	Up-regulated
At5g04180.1	ATACA3, ACA3 | alpha carbonic anhydrase 3 | chr5:1147907-1149237 REVERSE LENGTH=834	2.67948	0.00618291	Up-regulated
At5g64790.1	O-Glycosyl hydrolases family 17 protein | chr5:25902713-25904559 FORWARD LENGTH=1458	2.64921	0.00623559	Up-regulated
At2g39350.1	ABC-2 type transporter family protein | chr2:16430174-16432396 REVERSE LENGTH=2223	2.64785	0.00623866	Up-regulated
At5g15110.1	Pectate lyase family protein | chr5:4895966-4897682 FORWARD LENGTH=1419	2.64073	0.00635772	Up-regulated
At5g21100.1	Plant L-ascorbate oxidase | chr5:7168312-7170719 FORWARD LENGTH=1722	2.6402	0.00620496	Up-regulated
At4g34250.1	KCS16 | 3-ketoacyl-CoA synthase 16 | chr4:16394749-16396230 FORWARD LENGTH=1482	2.63389	0.00636066	Up-regulated
At1g22760.1	PAB3 | poly(A) binding protein 3 | chr1:8055599-8058799 FORWARD LENGTH=1983	2.629	0.006245	Up-regulated
At2g30290.1	VSR2, VSR1;2, BP80-1;2, AtVSR2 | VACUOLAR SORTING RECEPTOR 2 | chr2:12912890-12915781 REVERSE LENGTH=1878	2.62756	0.00634646	Up-regulated
At2g18570.1	UDP-Glycosyltransferase superfamily protein | chr2:8063429-8064841 FORWARD LENGTH=1413	2.62454	0.00635714	Up-regulated
At1g19640.1	JMT | jasmonic acid carboxyl methyltransferase | chr1:6789166-6791708 REVERSE LENGTH=1170	2.61984	0.0063424	Up-regulated
At4g15250.1	B-box type zinc finger protein with CCT domain | chr4:8709942-8711106 REVERSE LENGTH=993	2.61837	0.00630968	Up-regulated
At3g46520.1	ACT12 | actin-12 | chr3:17128567-17129981 FORWARD LENGTH=1134	2.60516	0.00644219	Up-regulated
At2g31980.1	AtCYS2, CYS2 | PHYTOCYSTATIN 2 | chr2:13609246-13609770 REVERSE LENGTH=444	2.59529	0.0064124	Up-regulated
At5g58050.1	SVL4 | SHV3-like 4 | chr5:23494498-23497386 REVERSE LENGTH=2262	2.59383	0.00688676	Up-regulated
At1g44222.1	NA	2.58424	0.00653588	Up-regulated
At5g24420.1	PGL5 | 6-phosphogluconolactonase 5 | chr5:8336943-8337879 REVERSE LENGTH=759	2.57864	0.00656923	Up-regulated
At1g20190.1	ATEXPA11, EXP11, ATEXP11, ATHEXP ALPHA 1.14, EXPA11 | expansin 11 | chr1:6998762-6999710 REVERSE LENGTH=759	2.57464	0.00656667	Up-regulated
At1g05580.1	ATCHX23, CHX23 | cation/H+ exchanger 23 | chr1:1665594-1668794 REVERSE LENGTH=2604	2.56902	0.00729371	Up-regulated
At2g36020.1	HVA22J | HVA22-like protein J | chr2:15123424-15125140 REVERSE LENGTH=777	2.55592	0.00726806	Up-regulated
At3g51590.1	LTP12 | lipid transfer protein 12 | chr3:19135828-19136654 REVERSE LENGTH=360	2.55406	0.00687007	Up-regulated
At2g23800.1	GGPS2, GGPS5 | geranylgeranyl pyrophosphate synthase 2 | chr2:10131619-10132749 REVERSE LENGTH=1131	2.5504	0.00677744	Up-regulated
At1g69500.1	CYP704B1 | cytochrome P450, family 704, subfamily B, polypeptide 1 | chr1:26123960-26125909 FORWARD LENGTH=1575	2.54931	0.00705324	Up-regulated
At3g51000.1	alpha/beta-Hydrolases superfamily protein | chr3:18945258-18946499 REVERSE LENGTH=972	2.54787	0.00680448	Up-regulated
At3g25050.1	XTH3 | xyloglucan endotransglucosylase/hydrolase 3 | chr3:9126872-9128218 FORWARD LENGTH=873	2.53856	0.00684593	Up-regulated
At5g12180.1	CPK17 | calcium-dependent protein kinase 17 | chr5:3937136-3939323 FORWARD LENGTH=1587	2.53252	0.00726338	Up-regulated
At3g13662.1	Disease resistance-responsive (dirigent-like protein) family protein | chr3:4467090-4468470 FORWARD LENGTH=522	2.53025	0.00684928	Up-regulated
At1g74550.1	CYP98A9 | cytochrome P450, family 98, subfamily A, polypeptide 9 | chr1:28016086-28017549 FORWARD LENGTH=1464	2.51252	0.00719433	Up-regulated
At4g35190.1	Putative lysine decarboxylase family protein | chr4:16746724-16748090 FORWARD LENGTH=687	2.50703	0.00712571	Up-regulated
At1g79910.1	Regulator of Vps4 activity in the MVB pathway protein | chr1:30055050-30057011 FORWARD LENGTH=1146	2.49007	0.00748276	Up-regulated
At4g37900.1	Protein of unknown function (duplicated DUF1399) | chr4:17821737-17824445 REVERSE LENGTH=2364	2.48086	0.00746986	Up-regulated
At3g54800.1	Pleckstrin homology (PH) and lipid-binding START domains-containing protein | chr3:20286378-20289880 FORWARD LENGTH=2202	2.46385	0.0087172	Up-regulated
At3g01700.1	AGP11, ATAGP11 | arabinogalactan protein 11 | chr3:258981-259391 FORWARD LENGTH=411	2.45323	0.00936522	Up-regulated
At1g61860.1	Protein kinase superfamily protein | chr1:22863079-22864619 REVERSE LENGTH=1170	2.45143	0.0092478	Up-regulated
At2g13680.1	CALS5, GLS2, ATGSL02 | callose synthase 5 | chr2:5695124-5706134 FORWARD LENGTH=5772	2.44998	0.00820133	Up-regulated
At5g60010.1	ferric reductase-like transmembrane component family protein | chr5:24160456-24164755 FORWARD LENGTH=2661	2.43985	0.00867922	Up-regulated
At4g37150.1	ATMES9, MES9 | methyl esterase 9 | chr4:17492985-17494057 REVERSE LENGTH=771	2.43577	0.00811757	Up-regulated
At5g61690.1	ATATH15, ATH15 | ABC2 homolog 15 | chr5:24789495-24793487 REVERSE LENGTH=2760	2.43434	0.00841192	Up-regulated
At4g37390.1	YDK1, GH3.2, BRU6, GH3-2, AUR3 | Auxin-responsive GH3 family protein | chr4:17579722-17581768 FORWARD LENGTH=1812	2.43196	0.00809932	Up-regulated
At2g31985.1	Protein of unknown function (DUF1264) | chr2:13614086-13615619 REVERSE LENGTH=726	2.42986	0.00824295	Up-regulated
At2g18130.1	PAP11, ATPAP11 | purple acid phosphatase 11 | chr2:7879308-7883935 REVERSE LENGTH=1326	2.39799	0.00866842	Up-regulated
At1g06360.1	Fatty acid desaturase family protein | chr1:1939173-1940417 REVERSE LENGTH=900	2.39073	0.00868	Up-regulated
At1g21540.1	AMP-dependent synthetase and ligase family protein | chr1:7548758-7550521 REVERSE LENGTH=1653	2.38735	0.00866405	Up-regulated
At5g39880.1	unknown protein; FUNCTIONS IN: molecular_function unknown; INVOLVED IN: biological_process unknown; LOCATED IN: endomembrane system; EXPRESSED IN: 10 plant structures; EXPRESSED DURING: L mature pollen stage, M germinated pollen stage, 4 anthesis, C globular stage, petal differentiation and expansion stage; BEST Arabidopsis thaliana protein match is: unknown protein (TAIR:AT3G28750.1); Has 25 Bla…	2.38177	0.0103813	Up-regulated
At5g35390.1	Leucine-rich repeat protein kinase family protein | chr5:13596918-13598976 FORWARD LENGTH=1989	2.37772	0.0094	Up-regulated
At4g10440.1	S-adenosyl-L-methionine-dependent methyltransferases superfamily protein | chr4:6459728-6461932 REVERSE LENGTH=1902	2.37289	0.00871667	Up-regulated
At5g50030.1	Plant invertase/pectin methylesterase inhibitor superfamily protein | chr5:20354666-20355449 FORWARD LENGTH=564	2.37236	0.0123472	Up-regulated
At4g17210.1	Plant protein of unknown function (DUF827) | chr4:9652585-9654257 REVERSE LENGTH=1584	2.36601	0.0103376	Up-regulated
At5g53390.1	O-acyltransferase (WSD1-like) family protein | chr5:21656951-21659207 REVERSE LENGTH=1461	2.3463	0.00885823	Up-regulated
At5g47470.1	Nodulin MtN21 /EamA-like transporter family protein | chr5:19254598-19256378 FORWARD LENGTH=1095	2.3409	0.0140587	Up-regulated
At1g58120.1	BEST Arabidopsis thaliana protein match is: methyltransferases (TAIR:AT5G01710.1); Has 93 Blast hits to 93 proteins in 15 species: Archae - 0; Bacteria - 0; Metazoa - 1; Fungi - 0; Plants - 92; Viruses - 0; Other Eukaryotes - 0 (source: NCBI BLink). | chr1:21520962-21522224 FORWARD LENGTH=1263	2.33556	0.00987778	Up-regulated
At4g15980.1	Plant invertase/pectin methylesterase inhibitor superfamily | chr4:9057466-9059983 REVERSE LENGTH=2106	2.32532	0.0102945	Up-regulated
At1g28270.1	RALFL4 | ralf-like 4 | chr1:9883165-9883497 FORWARD LENGTH=333	2.31532	0.0113126	Up-regulated
At3g49540.1	unknown protein; FUNCTIONS IN: molecular_function unknown; INVOLVED IN: N-terminal protein myristoylation; LOCATED IN: cellular_component unknown; Has 9244 Blast hits to 5308 proteins in 962 species: Archae - 18; Bacteria - 2665; Metazoa - 1953; Fungi - 964; Plants - 333; Viruses - 74; Other Eukaryotes - 3237 (source: NCBI BLink). | chr3:18365800-18366403 FORWARD LENGTH=501	2.30795	0.0113692	Up-regulated
At1g04580.1	AAO4, ATAO-4, ATAO2, AO4 | aldehyde oxidase 4 | chr1:1252212-1257510 REVERSE LENGTH=4014	2.2812	0.0102635	Up-regulated
At2g02540.1	ATHB21, ZFHD4, HB21, ZHD3 | homeobox protein 21 | chr2:684302-685234 FORWARD LENGTH=933	2.28057	0.0102726	Up-regulated
At4g32510.1	HCO3- transporter family | chr4:15685903-15688811 REVERSE LENGTH=2022	2.27875	0.0106712	Up-regulated
At3g11430.1	ATGPAT5, GPAT5 | glycerol-3-phosphate acyltransferase 5 | chr3:3595911-3597678 FORWARD LENGTH=1509	2.27731	0.0103012	Up-regulated
At2g22330.1	CYP79B3 | cytochrome P450, family 79, subfamily B, polypeptide 3 | chr2:9488601-9490983 FORWARD LENGTH=1632	2.27429	0.0103427	Up-regulated
At3g28007.1	SWEET4, AtSWEET4 | Nodulin MtN3 family protein | chr3:10408243-10409633 REVERSE LENGTH=756	2.27161	0.0103616	Up-regulated
At4g29030.1	Putative membrane lipoprotein | chr4:14307328-14307675 FORWARD LENGTH=348	2.26106	0.0103198	Up-regulated
At4g32480.1	Protein of unknown function (DUF506) | chr4:15676488-15677776 FORWARD LENGTH=864	2.25631	0.0103183	Up-regulated
At5g43340.1	PHT6, PHT1;6 | phosphate transporter 1;6 | chr5:17393598-17395148 REVERSE LENGTH=1551	2.24811	0.0102417	Up-regulated
At2g18660.1	PNP-A | plant natriuretic peptide A | chr2:8091032-8091644 REVERSE LENGTH=393	2.24123	0.0108615	Up-regulated
At1g55915.1	zinc ion binding | chr1:20907663-20909429 FORWARD LENGTH=1215	2.23271	0.0105303	Up-regulated
At4g01470.1	GAMMA-TIP3, TIP1;3, ATTIP1.3 | tonoplast intrinsic protein 1;3 | chr4:625092-625850 REVERSE LENGTH=759	2.22744	0.0113956	Up-regulated
At4g19645.1	TRAM, LAG1 and CLN8 (TLC) lipid-sensing domain containing protein | chr4:10689941-10691298 REVERSE LENGTH=807	2.22331	0.0105667	Up-regulated
At1g31740.1	BGAL15 | beta-galactosidase 15 | chr1:11365285-11369908 REVERSE LENGTH=2361	2.21965	0.0107159	Up-regulated
At2g02850.1	ARPN | plantacyanin | chr2:826630-827720 REVERSE LENGTH=390	2.21024	0.0113172	Up-regulated
At4g33355.1	Bifunctional inhibitor/lipid-transfer protein/seed storage 2S albumin superfamily protein | chr4:16067097-16067568 FORWARD LENGTH=360	2.21006	0.0112902	Up-regulated
At2g03740.1	late embryogenesis abundant domain-containing protein / LEA domain-containing protein | chr2:1142941-1143917 REVERSE LENGTH=570	2.20469	0.0112944	Up-regulated
At5g14380.1	AGP6 | arabinogalactan protein 6 | chr5:4636088-4636540 REVERSE LENGTH=453	2.19599	0.0154183	Up-regulated
At1g20120.1	GDSL-like Lipase/Acylhydrolase superfamily protein | chr1:6975504-6977123 FORWARD LENGTH=1209	2.19048	0.0113103	Up-regulated
At4g28395.1	ATA7, A7 | Bifunctional inhibitor/lipid-transfer protein/seed storage 2S albumin superfamily protein | chr4:14043991-14044728 FORWARD LENGTH=543	2.18607	0.0108202	Up-regulated
At2g22180.1	hydroxyproline-rich glycoprotein family protein | chr2:9428969-9429844 FORWARD LENGTH=876	2.1793	0.0132802	Up-regulated
At5g50080.1	ERF110 | ethylene response factor 110 | chr5:20365948-20366835 FORWARD LENGTH=663	2.17472	0.0119211	Up-regulated
At5g17480.1	APC1, PC1 | pollen calcium-binding protein 1 | chr5:5762689-5762940 FORWARD LENGTH=252	2.17425	0.0119153	Up-regulated
At1g55260.1	Bifunctional inhibitor/lipid-transfer protein/seed storage 2S albumin superfamily protein | chr1:20614663-20616158 FORWARD LENGTH=684	2.17008	0.0112856	Up-regulated
At5g61700.1	ATATH16, ATH16 | ABC2 homolog 16 | chr5:24793864-24797944 FORWARD LENGTH=2667	2.16881	0.0130769	Up-regulated
At3g02810.1	Protein kinase superfamily protein | chr3:608729-610785 REVERSE LENGTH=1677	2.16701	0.0145635	Up-regulated
At3g59530.1	LAP3 | Calcium-dependent phosphotriesterase superfamily protein | chr3:21993710-21995164 FORWARD LENGTH=1212	2.16386	0.0113149	Up-regulated
At1g04470.1	Protein of unknown function (DUF810) | chr1:1211177-1214591 REVERSE LENGTH=3108	2.13695	0.0190276	Up-regulated
At3g20530.1	Protein kinase superfamily protein | chr3:7166318-7167806 FORWARD LENGTH=1161	2.13533	0.0145167	Up-regulated
At4g04460.1	Saposin-like aspartyl protease family protein | chr4:2225232-2227746 FORWARD LENGTH=1527	2.12835	0.0123665	Up-regulated
At5g13380.1	Auxin-responsive GH3 family protein | chr5:4289912-4292355 FORWARD LENGTH=1875	2.12144	0.0123948	Up-regulated
At5g62730.1	Major facilitator superfamily protein | chr5:25197494-25200033 FORWARD LENGTH=1770	2.1129	0.0128113	Up-regulated
At5g53190.1	SWEET3, AtSWEET3 | Nodulin MtN3 family protein | chr5:21572417-21574284 REVERSE LENGTH=792	2.08927	0.0140716	Up-regulated
At5g42490.1	ATP binding microtubule motor family protein | chr5:16988609-16992622 REVERSE LENGTH=3264	2.08749	0.0186121	Up-regulated
At5g14130.1	Peroxidase superfamily protein | chr5:4558862-4560028 REVERSE LENGTH=993	2.08713	0.0203303	Up-regulated
At3g04290.1	ATLTL1, LTL1 | Li-tolerant lipase 1 | chr3:1133620-1136223 REVERSE LENGTH=1101	2.08382	0.0133459	Up-regulated
At5g47000.1	Peroxidase superfamily protein | chr5:19069171-19070175 REVERSE LENGTH=1005	2.07742	0.0201985	Up-regulated
At1g26480.1	GRF12, GF14 IOTA | general regulatory factor 12 | chr1:9156573-9157845 REVERSE LENGTH=807	2.07493	0.014827	Up-regulated
At1g73620.1	Pathogenesis-related thaumatin superfamily protein | chr1:27681432-27682954 FORWARD LENGTH=795	2.07161	0.0140663	Up-regulated
At5g57810.1	TET15 | tetraspanin15 | chr5:23424466-23425589 REVERSE LENGTH=954	2.06578	0.014499	Up-regulated
At3g21180.1	ACA9, ATACA9 | autoinhibited Ca(2+)-ATPase 9 | chr3:7425770-7431941 FORWARD LENGTH=3261	2.06019	0.0140227	Up-regulated
At1g64405.1	unknown protein; Has 13 Blast hits to 13 proteins in 7 species: Archae - 0; Bacteria - 0; Metazoa - 0; Fungi - 0; Plants - 13; Viruses - 0; Other Eukaryotes - 0 (source: NCBI BLink). | chr1:23923800-23924156 FORWARD LENGTH=357	2.0499	0.0134879	Up-regulated
At1g62940.1	ACOS5 | acyl-CoA synthetase 5 | chr1:23310554-23312747 FORWARD LENGTH=1629	2.0472	0.0137698	Up-regulated
At2g33880.1	WOX9, HB-3, STIP | homeobox-3 | chr2:14341639-14343597 REVERSE LENGTH=1137	2.03783	0.014097	Up-regulated
At5g48360.1	Actin-binding FH2 (formin homology 2) family protein | chr5:19595716-19598331 FORWARD LENGTH=2349	2.02909	0.0140693	Up-regulated
At4g02250.1	Plant invertase/pectin methylesterase inhibitor superfamily protein | chr4:983970-984523 FORWARD LENGTH=483	2.0283	0.0260122	Up-regulated
At1g74810.1	BOR5 | HCO3- transporter family | chr1:28108474-28111534 FORWARD LENGTH=2052	2.02575	0.0140563	Up-regulated
At5g58170.1	SVL5 | SHV3-like 5 | chr5:23540261-23543092 REVERSE LENGTH=2253	2.01954	0.0171052	Up-regulated
At3g62180.1	Plant invertase/pectin methylesterase inhibitor superfamily protein | chr3:23019832-23020479 REVERSE LENGTH=648	2.0191	0.0163831	Up-regulated
At2g47270.1	UPB1 | sequence-specific DNA binding transcription factors;transcription regulators | chr2:19411741-19412049 REVERSE LENGTH=309	2.01635	0.0145867	Up-regulated
At5g53820.1	Late embryogenesis abundant protein (LEA) family protein | chr5:21853475-21853866 FORWARD LENGTH=204	2.00983	0.015718	Up-regulated
At5g48575.1	Protein of unknown function (DUF1216) | chr5:19694465-19694822 REVERSE LENGTH=294	2.00423	0.0154836	Up-regulated
At3g48460.1	GDSL-like Lipase/Acylhydrolase superfamily protein | chr3:17949496-17951082 FORWARD LENGTH=1146	2.00105	0.0141845	Up-regulated
At5g15800.1	SEP1, AGL2 | K-box region and MADS-box transcription factor family protein | chr5:5151594-5153767 REVERSE LENGTH=756	1.99656	0.0146623	Up-regulated
At4g25040.1	Uncharacterised protein family (UPF0497) | chr4:12868320-12869319 FORWARD LENGTH=513	1.99429	0.0154028	Up-regulated
At1g02790.1	PGA4 | polygalacturonase 4 | chr1:610681-612225 REVERSE LENGTH=1269	1.9935	0.0165807	Up-regulated
At4g13560.1	UNE15 | Late embryogenesis abundant protein (LEA) family protein | chr4:7879764-7880311 REVERSE LENGTH=330	1.9905	0.0184732	Up-regulated
At3g02110.1	scpl25 | serine carboxypeptidase-like 25 | chr3:370902-373637 REVERSE LENGTH=1422	1.98726	0.0148131	Up-regulated
At1g07610.1	MT1C | metallothionein 1C | chr1:2341603-2341865 FORWARD LENGTH=138	1.98663	0.0259394	Up-regulated
At3g19020.1	Leucine-rich repeat (LRR) family protein | chr3:6559174-6562044 REVERSE LENGTH=2871	1.98227	0.0196548	Up-regulated
At1g71160.1	KCS7 | 3-ketoacyl-CoA synthase 7 | chr1:26828788-26830170 REVERSE LENGTH=1383	1.97768	0.0146009	Up-regulated
At3g01420.1	ALPHA-DOX1, DOX1, DIOX1, PADOX-1 | Peroxidase superfamily protein | chr3:159689-162726 REVERSE LENGTH=1920	1.9769	0.0150361	Up-regulated
At2g19050.1	GDSL-like Lipase/Acylhydrolase superfamily protein | chr2:8253416-8255534 FORWARD LENGTH=1050	1.96712	0.0178772	Up-regulated
At4g38190.1	ATCSLD4, CSLD4 | cellulose synthase like D4 | chr4:17910096-17913641 REVERSE LENGTH=3336	1.96603	0.017821	Up-regulated
At1g24520.1	BCP1 | homolog of Brassica campestris pollen protein 1 | chr1:8688699-8689058 FORWARD LENGTH=360	1.96281	0.0225972	Up-regulated
At4g26260.1	MIOX4 | myo-inositol oxygenase 4 | chr4:13297939-13300146 FORWARD LENGTH=954	1.96059	0.0274759	Up-regulated
At4g18970.1	GDSL-like Lipase/Acylhydrolase superfamily protein | chr4:10389308-10390808 REVERSE LENGTH=1086	1.95859	0.0158045	Up-regulated
At3g54240.1	alpha/beta-Hydrolases superfamily protein | chr3:20080926-20082145 FORWARD LENGTH=1053	1.95534	0.0189624	Up-regulated
At3g58480.1	calmodulin-binding family protein | chr3:21629341-21631853 FORWARD LENGTH=1728	1.95108	0.0183698	Up-regulated
At1g68640.1	PAN | bZIP transcription factor family protein | chr1:25769739-25772303 REVERSE LENGTH=1359	1.95096	0.0153982	Up-regulated
At1g72970.1	HTH, EDA17 | Glucose-methanol-choline (GMC) oxidoreductase family protein | chr1:27452872-27455706 FORWARD LENGTH=1785	1.94996	0.0155403	Up-regulated
At2g34810.1	FAD-binding Berberine family protein | chr2:14685292-14686914 FORWARD LENGTH=1623	1.94182	0.0188773	Up-regulated
At3g06830.1	Plant invertase/pectin methylesterase inhibitor superfamily | chr3:2154193-2156062 FORWARD LENGTH=1707	1.93856	0.0190632	Up-regulated
At2g26410.1	Iqd4 | IQ-domain 4 | chr2:11234651-11236719 REVERSE LENGTH=1584	1.93347	0.021003	Up-regulated
At3g01240.1	unknown protein; FUNCTIONS IN: molecular_function unknown; INVOLVED IN: biological_process unknown; LOCATED IN: endomembrane system; EXPRESSED IN: 11 plant structures; EXPRESSED DURING: L mature pollen stage, M germinated pollen stage, 4 anthesis, C globular stage, petal differentiation and expansion stage; BEST Arabidopsis thaliana protein match is: unknown protein (TAIR:AT3G01230.1); Has 12 Bla…	1.92177	0.0238189	Up-regulated
At4g39610.1	Protein of unknown function, DUF617 | chr4:18393808-18394602 REVERSE LENGTH=795	1.92057	0.0288901	Up-regulated
At5g51750.1	ATSBT1.3, SBT1.3 | subtilase 1.3 | chr5:21020266-21022608 FORWARD LENGTH=2343	1.9183	0.0160527	Up-regulated
At2g42830.1	SHP2, AGL5 | K-box region and MADS-box transcription factor family protein | chr2:17820602-17823806 FORWARD LENGTH=741	1.91683	0.0165018	Up-regulated
At1g64660.1	ATMGL, MGL | methionine gamma-lyase | chr1:24028977-24030537 FORWARD LENGTH=1326	1.91661	0.0165198	Up-regulated
At3g21420.1	2-oxoglutarate (2OG) and Fe(II)-dependent oxygenase superfamily protein | chr3:7541579-7543221 FORWARD LENGTH=1095	1.91599	0.0177017	Up-regulated
At3g57950.1	unknown protein; FUNCTIONS IN: molecular_function unknown; INVOLVED IN: biological_process unknown; LOCATED IN: chloroplast; EXPRESSED IN: 9 plant structures; EXPRESSED DURING: 4 anthesis, C globular stage, petal differentiation and expansion stage; BEST Arabidopsis thaliana protein match is: unknown protein (TAIR:AT2G42180.1); Has 81 Blast hits to 81 proteins in 11 species: Archae - 0; Bacteria …	1.90932	0.0196774	Up-regulated
At5g61740.1	ATATH14, ATH14 | ABC2 homolog 14 | chr5:24808484-24812597 FORWARD LENGTH=2547	1.9064	0.0182787	Up-regulated
At4g04930.1	DES-1-LIKE | fatty acid desaturase family protein | chr4:2509236-2510918 FORWARD LENGTH=999	1.90631	0.0240725	Up-regulated
At3g05610.1	Plant invertase/pectin methylesterase inhibitor superfamily | chr3:1625876-1627976 REVERSE LENGTH=2010	1.90547	0.0219374	Up-regulated
At2g36400.1	AtGRF3, GRF3 | growth-regulating factor 3 | chr2:15270300-15272617 REVERSE LENGTH=1197	1.90189	0.0171546	Up-regulated
At2g28790.1	Pathogenesis-related thaumatin superfamily protein | chr2:12354664-12355413 REVERSE LENGTH=750	1.89562	0.017895	Up-regulated
At3g10320.1	Glycosyltransferase family 61 protein | chr3:3195441-3197111 REVERSE LENGTH=1485	1.8941	0.017881	Up-regulated
At5g26700.1	RmlC-like cupins superfamily protein | chr5:9308439-9309548 REVERSE LENGTH=642	1.894	0.0233694	Up-regulated
At5g61440.1	ACHT5 | atypical CYS HIS rich thioredoxin 5 | chr5:24707658-24708684 FORWARD LENGTH=738	1.89314	0.017841	Up-regulated
At4g28720.1	YUC8 | Flavin-binding monooxygenase family protein | chr4:14192688-14193968 FORWARD LENGTH=1281	1.88632	0.0212037	Up-regulated
At2g17500.1	Auxin efflux carrier family protein | chr2:7607063-7608990 FORWARD LENGTH=1191	1.88548	0.0176433	Up-regulated
At5g23960.1	ATTPS21, TPS21 | terpene synthase 21 | chr5:8092969-8095128 FORWARD LENGTH=1644	1.88245	0.0185304	Up-regulated
At5g09550.1	GDP dissociation inhibitor family protein / Rab GTPase activator family protein | chr5:2963850-2966465 FORWARD LENGTH=1338	1.88065	0.0222141	Up-regulated
At1g15460.1	ATBOR4, BOR4 | HCO3- transporter family | chr1:5310196-5313376 REVERSE LENGTH=2052	1.88064	0.017685	Up-regulated
At1g29140.1	Pollen Ole e 1 allergen and extensin family protein | chr1:10179029-10179811 FORWARD LENGTH=516	1.87855	0.0226644	Up-regulated
At3g20865.1	AGP40 | arabinogalactan protein 40 | chr3:7308699-7308887 REVERSE LENGTH=189	1.87841	0.0221787	Up-regulated
At3g46770.1	AP2/B3-like transcriptional factor family protein | chr3:17224064-17225316 FORWARD LENGTH=831	1.87728	0.0178205	Up-regulated
At4g34400.1	AP2/B3-like transcriptional factor family protein | chr4:16445323-16447596 FORWARD LENGTH=1194	1.87424	0.0178754	Up-regulated
At4g00350.1	MATE efflux family protein | chr4:151978-153988 FORWARD LENGTH=1629	1.87115	0.0226448	Up-regulated
At5g54095.1	unknown protein; FUNCTIONS IN: molecular_function unknown; INVOLVED IN: N-terminal protein myristoylation; LOCATED IN: cellular_component unknown; EXPRESSED IN: 9 plant structures; EXPRESSED DURING: L mature pollen stage, M germinated pollen stage, 4 anthesis, C globular stage, petal differentiation and expansion stage; BEST Arabidopsis thaliana protein match is: unknown protein (TAIR:AT4G27580.1…	1.87099	0.0263796	Up-regulated
At1g10010.1	AAP8, ATAAP8 | amino acid permease 8 | chr1:3265976-3268726 FORWARD LENGTH=1428	1.86879	0.0178496	Up-regulated
At4g31370.1	FLA5 | FASCICLIN-like arabinogalactan protein 5 precursor | chr4:15223838-15224674 REVERSE LENGTH=837	1.86809	0.0196985	Up-regulated
At3g05600.1	alpha/beta-Hydrolases superfamily protein | chr3:1623485-1624704 REVERSE LENGTH=996	1.86487	0.0200397	Up-regulated
At3g55290.1	NAD(P)-binding Rossmann-fold superfamily protein | chr3:20502653-20503730 FORWARD LENGTH=843	1.86342	0.01792	Up-regulated
At2g41860.1	CPK14 | calcium-dependent protein kinase 14 | chr2:17467646-17469786 REVERSE LENGTH=1593	1.85617	0.0250411	Up-regulated
At1g30020.1	Protein of unknown function, DUF538 | chr1:10515874-10516347 REVERSE LENGTH=474	1.84666	0.0181012	Up-regulated
At4g25780.1	CAP (Cysteine-rich secretory proteins, Antigen 5, and Pathogenesis-related 1 protein) superfamily protein | chr4:13121107-13121679 FORWARD LENGTH=573	1.84155	0.0368011	Up-regulated
At4g16745.1	Exostosin family protein | chr4:9412185-9414053 FORWARD LENGTH=1629	1.83255	0.0225895	Up-regulated
At2g42410.1	ZFP11, ATZFP11 | zinc finger protein 11 | chr2:17658150-17658794 FORWARD LENGTH=645	1.83091	0.0230801	Up-regulated
At4g31230.1	Protein kinase protein with adenine nucleotide alpha hydrolases-like domain | chr4:15173071-15176109 REVERSE LENGTH=2295	1.82954	0.0307392	Up-regulated
At5g19360.1	CPK34 | calcium-dependent protein kinase 34 | chr5:6521716-6523780 REVERSE LENGTH=1572	1.82658	0.0441147	Up-regulated
At4g19380.1	Long-chain fatty alcohol dehydrogenase family protein | chr4:10568427-10572288 REVERSE LENGTH=2181	1.82043	0.0189095	Up-regulated
At3g26130.1	Cellulase (glycosyl hydrolase family 5) protein | chr3:9553708-9555611 REVERSE LENGTH=1656	1.81946	0.0188208	Up-regulated
At5g44300.1	Dormancy/auxin associated family protein | chr5:17845371-17846179 REVERSE LENGTH=345	1.81859	0.0218022	Up-regulated
At5g62230.1	ERL1 | ERECTA-like 1 | chr5:24996433-25002130 FORWARD LENGTH=2901	1.81708	0.0195698	Up-regulated
At1g28710.1	Nucleotide-diphospho-sugar transferase family protein | chr1:10086850-10088025 REVERSE LENGTH=1023	1.81269	0.0188884	Up-regulated
At5g28640.1	AN3, GIF, GIF1, ATGIF1 | SSXT family protein | chr5:10647831-10649620 REVERSE LENGTH=633	1.81104	0.0191891	Up-regulated
At1g25240.1	ENTH/VHS/GAT family protein | chr1:8845231-8846361 FORWARD LENGTH=1131	1.81002	0.0391639	Up-regulated
At5g23940.1	EMB3009, PEL3, DCR | HXXXD-type acyl-transferase family protein | chr5:8076616-8079677 REVERSE LENGTH=1455	1.80883	0.0190508	Up-regulated
At1g73325.1	Kunitz family trypsin and protease inhibitor protein | chr1:27567518-27568186 REVERSE LENGTH=669	1.80615	0.0211104	Up-regulated
At3g08560.1	VHA-E2 | vacuolar H+-ATPase subunit E isoform 2 | chr3:2600130-2601907 FORWARD LENGTH=708	1.79515	0.0219986	Up-regulated
At1g67290.1	glyoxal oxidase-related protein | chr1:25191168-25193160 REVERSE LENGTH=1848	1.78588	0.0260667	Up-regulated
At1g04670.1	unknown protein; Has 40 Blast hits to 40 proteins in 14 species: Archae - 2; Bacteria - 5; Metazoa - 1; Fungi - 2; Plants - 30; Viruses - 0; Other Eukaryotes - 0 (source: NCBI BLink). | chr1:1301985-1302532 FORWARD LENGTH=381	1.7842	0.0272921	Up-regulated
At4g24640.1	APPB1 | Plant invertase/pectin methylesterase inhibitor superfamily protein | chr4:12717851-12718804 FORWARD LENGTH=564	1.77913	0.0359471	Up-regulated
At2g28680.1	RmlC-like cupins superfamily protein | chr2:12303118-12304747 REVERSE LENGTH=1071	1.77358	0.0206158	Up-regulated
At1g69040.1	ACR4 | ACT domain repeat 4 | chr1:25958196-25960079 FORWARD LENGTH=1356	1.76963	0.0208403	Up-regulated
At1g75910.1	EXL4 | extracellular lipase 4 | chr1:28501511-28503096 FORWARD LENGTH=1032	1.76452	0.0206453	Up-regulated
At1g26610.1	C2H2-like zinc finger protein | chr1:9193735-9195102 FORWARD LENGTH=1368	1.76408	0.0220043	Up-regulated
At5g59810.1	ATSBT5.4, SBT5.4 | Subtilase family protein | chr5:24096895-24100387 REVERSE LENGTH=2337	1.76212	0.0206494	Up-regulated
At3g22910.1	ATPase E1-E2 type family protein / haloacid dehalogenase-like hydrolase family protein | chr3:8116335-8119388 REVERSE LENGTH=3054	1.75609	0.0247047	Up-regulated
At5g56220.1	P-loop containing nucleoside triphosphate hydrolases superfamily protein | chr5:22754871-22757792 FORWARD LENGTH=2922	1.7524	0.0212316	Up-regulated
At5g56510.1	APUM12, PUM12 | pumilio 12 | chr5:22881721-22883842 FORWARD LENGTH=1791	1.74368	0.0218131	Up-regulated
At1g06520.1	ATGPAT1, GPAT1 | glycerol-3-phosphate acyltransferase 1 | chr1:1994170-1996067 REVERSE LENGTH=1758	1.73353	0.0218234	Up-regulated
At5g33370.1	GDSL-like Lipase/Acylhydrolase superfamily protein | chr5:12602773-12604670 REVERSE LENGTH=1101	1.72865	0.0219405	Up-regulated
At1g28430.1	CYP705A24 | cytochrome P450, family 705, subfamily A, polypeptide 24 | chr1:9992986-9994642 REVERSE LENGTH=1566	1.72431	0.0220347	Up-regulated
At1g68110.1	ENTH/ANTH/VHS superfamily protein | chr1:25524901-25526040 FORWARD LENGTH=1140	1.72275	0.0303713	Up-regulated
At4g32500.1	AKT5, KT5 | K+ transporter 5 | chr4:15681122-15685214 FORWARD LENGTH=2643	1.71706	0.0222071	Up-regulated
At1g22380.1	AtUGT85A3, UGT85A3 | UDP-glucosyl transferase 85A3 | chr1:7900522-7902332 REVERSE LENGTH=1467	1.71692	0.0218914	Up-regulated
At2g37025.1	TRFL8 | TRF-like 8 | chr2:15550042-15551957 FORWARD LENGTH=1233	1.71157	0.0224035	Up-regulated
At5g03620.1	Subtilisin-like serine endopeptidase family protein | chr5:918738-921874 FORWARD LENGTH=2301	1.70973	0.0230522	Up-regulated
At2g18470.1	PERK4 | roline-rich extensin-like receptor kinase 4 | chr2:8005285-8007767 REVERSE LENGTH=1902	1.70843	0.0408366	Up-regulated
At1g22130.1	AGL104 | AGAMOUS-like 104 | chr1:7812387-7814259 REVERSE LENGTH=1008	1.70719	0.0265441	Up-regulated
At5g06300.1	Putative lysine decarboxylase family protein | chr5:1922042-1925278 REVERSE LENGTH=654	1.70264	0.0255412	Up-regulated
At5g25400.1	Nucleotide-sugar transporter family protein | chr5:8823283-8824332 FORWARD LENGTH=1050	1.68678	0.023381	Up-regulated
At2g04570.1	GDSL-like Lipase/Acylhydrolase superfamily protein | chr2:1594747-1596129 FORWARD LENGTH=1053	1.68638	0.0230833	Up-regulated
At4g16515.1	RGF6 | Encodes a root meristem growth factor (RGF). Belongs to a family of functionally redundant homologous peptides that are secreted, tyrosine-sulfated, and expressed mainly in the stem cell area and the innermost layer of central columella cells. RGFs are required for maintenance of the root stem cell niche and transit amplifying cell proliferation. Members of this family include: At5g60810 (…	1.68588	0.0230262	Up-regulated
At4g30610.1	BRS1, SCPL24 | alpha/beta-Hydrolases superfamily protein | chr4:14944219-14948391 FORWARD LENGTH=1398	1.68167	0.0240108	Up-regulated
At5g12050.1	unknown protein; BEST Arabidopsis thaliana protein match is: unknown protein (TAIR:AT3G13980.1); Has 1807 Blast hits to 1807 proteins in 277 species: Archae - 0; Bacteria - 0; Metazoa - 736; Fungi - 347; Plants - 385; Viruses - 0; Other Eukaryotes - 339 (source: NCBI BLink). | chr5:3890213-3891301 FORWARD LENGTH=1089	1.67281	0.0244147	Up-regulated
At2g47810.1	NF-YB5 | nuclear factor Y, subunit B5 | chr2:19582938-19583420 REVERSE LENGTH=483	1.66429	0.0258097	Up-regulated
At4g11140.1	CRF1 | cytokinin response factor 1 | chr4:6794930-6795793 REVERSE LENGTH=864	1.65603	0.0256573	Up-regulated
At3g18360.1	VQ motif-containing protein | chr3:6300827-6301684 REVERSE LENGTH=858	1.65371	0.0251855	Up-regulated
At3g23380.1	RIC5 | ROP-interactive CRIB motif-containing protein 5 | chr3:8373947-8374708 FORWARD LENGTH=582	1.6535	0.0377282	Up-regulated
At3g17010.1	AP2/B3-like transcriptional factor family protein | chr3:5800460-5802303 FORWARD LENGTH=909	1.65313	0.0250007	Up-regulated
At1g18250.1	ATLP-1 | Pathogenesis-related thaumatin superfamily protein | chr1:6277024-6278005 REVERSE LENGTH=732	1.65105	0.0256151	Up-regulated
At1g75890.1	GDSL-like Lipase/Acylhydrolase superfamily protein | chr1:28493051-28495047 FORWARD LENGTH=1140	1.64598	0.025169	Up-regulated
At1g01780.1	GATA type zinc finger transcription factor family protein | chr1:282919-284082 FORWARD LENGTH=618	1.64593	0.0299061	Up-regulated
At2g46210.1	Fatty acid/sphingolipid desaturase | chr2:18977542-18978891 FORWARD LENGTH=1350	1.63934	0.0352766	Up-regulated
At5g61710.1	unknown protein; BEST Arabidopsis thaliana protein match is: unknown protein (TAIR:AT4G02160.1); Has 1807 Blast hits to 1807 proteins in 277 species: Archae - 0; Bacteria - 0; Metazoa - 736; Fungi - 347; Plants - 385; Viruses - 0; Other Eukaryotes - 339 (source: NCBI BLink). | chr5:24800045-24800512 FORWARD LENGTH=468	1.63414	0.0439971	Up-regulated
At5g51460.3	ATTPPA | Haloacid dehalogenase-like hydrolase (HAD) superfamily protein | chr5:20902266-20904292 FORWARD LENGTH=1158	1.62627	0.0352446	Up-regulated
At3g09530.1	ATEXO70H3, EXO70H3 | exocyst subunit exo70 family protein H3 | chr3:2926302-2928215 FORWARD LENGTH=1914	1.62268	0.0404005	Up-regulated
At4g29305.1	LCR25 | low-molecular-weight cysteine-rich 25 | chr4:14436284-14436631 REVERSE LENGTH=234	1.6226	0.0457518	Up-regulated
At1g75640.1	Leucine-rich receptor-like protein kinase family protein | chr1:28403600-28407022 REVERSE LENGTH=3423	1.6216	0.0257754	Up-regulated
At4g21680.1	NRT1.8 | NITRATE TRANSPORTER 1.8 | chr4:11517540-11519576 REVERSE LENGTH=1770	1.62121	0.0270905	Up-regulated
At5g03690.1	Aldolase superfamily protein | chr5:963389-964982 REVERSE LENGTH=1182	1.6208	0.0427734	Up-regulated
At4g15610.1	Uncharacterised protein family (UPF0497) | chr4:8909162-8910641 FORWARD LENGTH=582	1.61399	0.0321677	Up-regulated
At5g62850.1	AtVEX1, SWEET5, AtSWEET5 | Nodulin MtN3 family protein | chr5:25230204-25231527 REVERSE LENGTH=723	1.6085	0.0325608	Up-regulated
At2g44080.1	ARL | ARGOS-like | chr2:18237726-18238133 FORWARD LENGTH=408	1.60681	0.0369663	Up-regulated
At1g62450.1	Immunoglobulin E-set superfamily protein | chr1:23115958-23117370 REVERSE LENGTH=672	1.60457	0.0326054	Up-regulated
At5g27330.1	Prefoldin chaperone subunit family protein | chr5:9632997-9634883 REVERSE LENGTH=1887	1.60412	0.0280569	Up-regulated
At5g15310.1	ATMYB16, ATMIXTA, MYB16 | myb domain protein 16 | chr5:4974894-4976106 FORWARD LENGTH=981	1.60399	0.0264834	Up-regulated
At5g57123.1	unknown protein; BEST Arabidopsis thaliana protein match is: unknown protein (TAIR:AT4G29905.1); Has 30201 Blast hits to 17322 proteins in 780 species: Archae - 12; Bacteria - 1396; Metazoa - 17338; Fungi - 3422; Plants - 5037; Viruses - 0; Other Eukaryotes - 2996 (source: NCBI BLink). | chr5:23127215-23127418 REVERSE LENGTH=204	1.60106	0.0284341	Up-regulated
At5g62960.1	unknown protein; BEST Arabidopsis thaliana protein match is: unknown protein (TAIR:AT1G10660.1); Has 35333 Blast hits to 34131 proteins in 2444 species: Archae - 798; Bacteria - 22429; Metazoa - 974; Fungi - 991; Plants - 531; Viruses - 0; Other Eukaryotes - 9610 (source: NCBI BLink). | chr5:25269444-25271533 FORWARD LENGTH=1044	1.59885	0.0274925	Up-regulated
At3g04070.1	anac047, NAC047 | NAC domain containing protein 47 | chr3:1061573-1062976 REVERSE LENGTH=1080	1.59303	0.0306701	Up-regulated
At2g19500.1	CKX2, ATCKX2 | cytokinin oxidase 2 | chr2:8444311-8447301 REVERSE LENGTH=1506	1.59264	0.028428	Up-regulated
At1g54575.1	unknown protein; Has 35333 Blast hits to 34131 proteins in 2444 species: Archae - 798; Bacteria - 22429; Metazoa - 974; Fungi - 991; Plants - 531; Viruses - 0; Other Eukaryotes - 9610 (source: NCBI BLink). | chr1:20387106-20387414 FORWARD LENGTH=309	1.58793	0.0352296	Up-regulated
At3g46040.1	RPS15AD | ribosomal protein S15A D | chr3:16914891-16915529 FORWARD LENGTH=393	1.58152	0.0339882	Up-regulated
At5g67110.1	ALC | basic helix-loop-helix (bHLH) DNA-binding superfamily protein | chr5:26785332-26786338 REVERSE LENGTH=633	1.57582	0.0283464	Up-regulated
At3g13610.1	2-oxoglutarate (2OG) and Fe(II)-dependent oxygenase superfamily protein | chr3:4449448-4450616 FORWARD LENGTH=1086	1.57321	0.0358399	Up-regulated
At3g43120.1	SAUR-like auxin-responsive protein family | chr3:15094644-15095312 FORWARD LENGTH=483	1.5725	0.038104	Up-regulated
At5g16500.1	Protein kinase superfamily protein | chr5:5386733-5389003 REVERSE LENGTH=1911	1.56822	0.0390909	Up-regulated
At2g29150.1	NAD(P)-binding Rossmann-fold superfamily protein | chr2:12535715-12536964 REVERSE LENGTH=807	1.5623	0.0315315	Up-regulated
At2g40116.1	Phosphoinositide-specific phospholipase C family protein | chr2:16751782-16754311 FORWARD LENGTH=1842	1.55548	0.0476567	Up-regulated
At3g06100.1	NLM6, NLM8, NIP7;1 | NOD26-like intrinsic protein 7;1 | chr3:1841388-1842934 REVERSE LENGTH=828	1.55479	0.0304147	Up-regulated
At5g59040.1	COPT3 | copper transporter 3 | chr5:23836724-23837179 FORWARD LENGTH=456	1.55474	0.02972	Up-regulated
At1g64800.1	DNA binding;sequence-specific DNA binding transcription factors | chr1:24085086-24085433 FORWARD LENGTH=348	1.54787	0.0351828	Up-regulated
At5g58830.1	Subtilisin-like serine endopeptidase family protein | chr5:23755787-23758600 FORWARD LENGTH=2106	1.5406	0.0303271	Up-regulated
At3g48340.1	Cysteine proteinases superfamily protein | chr3:17897739-17899074 FORWARD LENGTH=1086	1.53899	0.0365562	Up-regulated
At5g44400.1	FAD-binding Berberine family protein | chr5:17886365-17888071 REVERSE LENGTH=1614	1.53677	0.0306691	Up-regulated
At1g03550.1	Secretory carrier membrane protein (SCAMP) family protein | chr1:885851-887778 REVERSE LENGTH=852	1.52749	0.0352755	Up-regulated
At2g29470.1	ATGSTU3, GST21, GSTU3 | glutathione S-transferase tau 3 | chr2:12628666-12629490 REVERSE LENGTH=678	1.52645	0.0339516	Up-regulated
At1g50610.1	Leucine-rich repeat protein kinase family protein | chr1:18742171-18744501 FORWARD LENGTH=2061	1.52196	0.0428242	Up-regulated
At2g40990.1	DHHC-type zinc finger family protein | chr2:17105097-17106773 REVERSE LENGTH=1236	1.52004	0.043938	Up-regulated
At2g19770.1	PRF5 | profilin 5 | chr2:8519885-8521119 REVERSE LENGTH=405	1.51785	0.0475855	Up-regulated
At1g48940.1	ENODL6, AtENODL6 | early nodulin-like protein 6 | chr1:18105808-18106422 REVERSE LENGTH=534	1.51731	0.03256	Up-regulated
At2g43110.1	unknown protein; Has 212 Blast hits to 211 proteins in 96 species: Archae - 0; Bacteria - 6; Metazoa - 62; Fungi - 91; Plants - 31; Viruses - 0; Other Eukaryotes - 22 (source: NCBI BLink). | chr2:17922067-17924291 FORWARD LENGTH=867	1.51665	0.0352023	Up-regulated
At1g06080.1	ADS1 | delta 9 desaturase 1 | chr1:1843661-1846093 FORWARD LENGTH=918	1.51338	0.0344651	Up-regulated
At5g13330.1	Rap2.6L | related to AP2 6l | chr5:4272384-4274461 FORWARD LENGTH=639	1.50953	0.0339194	Up-regulated
At1g28700.1	Nucleotide-diphospho-sugar transferase family protein | chr1:10083773-10084958 REVERSE LENGTH=1017	1.49353	0.0353734	Up-regulated
At5g15140.1	Galactose mutarotase-like superfamily protein | chr5:4908686-4910670 FORWARD LENGTH=1473	1.49184	0.0412167	Up-regulated
At4g03926.1	pseudogene pseudogene, similar to Pectinesterase 3 precursor (EC 3.1.1.11) (Pectin methylesterase 3) (PE 3). (Tomato), blastp match of 61% identity and 9.6e-28 P-value to SP|Q96576|PME3_LYCES Pectinesterase 3 precursor (EC 3.1.1.11) (Pectin methylesterase 3) (PE 3). (Tomato) {Lycopersicon esculentum}	1.49148	0.0358978	Up-regulated
At2g31220.1	basic helix-loop-helix (bHLH) DNA-binding superfamily protein | chr2:13303014-13304661 FORWARD LENGTH=1377	1.48998	0.0352517	Up-regulated
At3g49360.1	PGL2 | 6-phosphogluconolactonase 2 | chr3:18303189-18304283 REVERSE LENGTH=780	1.48747	0.0351353	Up-regulated
At5g16960.1	Zinc-binding dehydrogenase family protein | chr5:5574537-5575884 REVERSE LENGTH=1041	1.48691	0.0361453	Up-regulated
At5g45200.1	Disease resistance protein (TIR-NBS-LRR class) family | chr5:18283967-18290332 REVERSE LENGTH=3786	1.4865	0.0375008	Up-regulated
At1g25330.1	basic helix-loop-helix (bHLH) DNA-binding superfamily protein | chr1:8880515-8882018 REVERSE LENGTH=672	1.48405	0.035933	Up-regulated
At2g21480.1	Malectin/receptor-like protein kinase family protein | chr2:9202753-9205368 REVERSE LENGTH=2616	1.48369	0.0443231	Up-regulated
At2g31210.1	basic helix-loop-helix (bHLH) DNA-binding superfamily protein | chr2:13296655-13298139 FORWARD LENGTH=1287	1.48211	0.0352997	Up-regulated
At4g10850.1	SWEET7, AtSWEET7 | Nodulin MtN3 family protein | chr4:6675068-6676718 FORWARD LENGTH=777	1.4818	0.0352459	Up-regulated
At3g12143.1	pseudogene pseudogene, similar to polygalacturonase-inhibitor protein, blastp match of 53% identity and 7.5e-64 P-value to GP|18148923|dbj|BAB83520.1||AB064545 polygalacturonase-inhibitor protein {Citrus sp. cv. Sainumphung}	1.4813	0.0358678	Up-regulated
At2g36270.1	ABI5, GIA1 | Basic-leucine zipper (bZIP) transcription factor family protein | chr2:15204980-15206571 REVERSE LENGTH=1329	1.4802	0.0364298	Up-regulated
At4g11080.1	HMG (high mobility group) box protein | chr4:6760898-6763272 REVERSE LENGTH=1341	1.47796	0.0352819	Up-regulated
At2g39130.1	Transmembrane amino acid transporter family protein | chr2:16323171-16326744 REVERSE LENGTH=1653	1.47772	0.0359363	Up-regulated
At4g18290.1	KAT2 | potassium channel in Arabidopsis thaliana 2 | chr4:10115418-10118477 FORWARD LENGTH=2094	1.47667	0.0448508	Up-regulated
At4g32460.1	Protein of unknown function, DUF642 | chr4:15663036-15664859 REVERSE LENGTH=1098	1.47585	0.0359799	Up-regulated
At4g29250.1	HXXXD-type acyl-transferase family protein | chr4:14420713-14422177 FORWARD LENGTH=1383	1.47574	0.0412415	Up-regulated
At5g66740.1	Protein of unknown function (DUF620) | chr5:26647114-26648558 FORWARD LENGTH=1113	1.47513	0.0411824	Up-regulated
At3g61680.1	alpha/beta-Hydrolases superfamily protein | chr3:22824630-22826926 FORWARD LENGTH=1950	1.47455	0.0354582	Up-regulated
At1g25340.1	MYB116, AtMYB116 | myb domain protein 116 | chr1:8885210-8886271 FORWARD LENGTH=852	1.46846	0.0366656	Up-regulated
At3g52160.1	KCS15 | 3-ketoacyl-CoA synthase 15 | chr3:19345069-19346591 REVERSE LENGTH=1356	1.45271	0.0366291	Up-regulated
At4g34860.1	Plant neutral invertase family protein | chr4:16609955-16612019 REVERSE LENGTH=1716	1.44544	0.0375496	Up-regulated
At1g77210.1	STP14, AtSTP14 | sugar transporter 14 | chr1:29009036-29010980 REVERSE LENGTH=1515	1.44524	0.0370358	Up-regulated
At2g39510.1	nodulin MtN21 /EamA-like transporter family protein | chr2:16491358-16493085 REVERSE LENGTH=1125	1.44397	0.037622	Up-regulated
At1g22240.1	APUM8, PUM8 | pumilio 8 | chr1:7853084-7854963 FORWARD LENGTH=1548	1.44346	0.0375957	Up-regulated
At4g12530.1	Bifunctional inhibitor/lipid-transfer protein/seed storage 2S albumin superfamily protein | chr4:7428141-7428494 REVERSE LENGTH=354	1.44069	0.0421327	Up-regulated
At1g43910.1	P-loop containing nucleoside triphosphate hydrolases superfamily protein | chr1:16656050-16657628 REVERSE LENGTH=1428	1.44055	0.0371719	Up-regulated
At2g41550.1	Rho termination factor | chr2:17329086-17330830 REVERSE LENGTH=1428	1.43956	0.0374658	Up-regulated
At1g26780.1	MYB117, AtMYB117, LOF1 | myb domain protein 117 | chr1:9271033-9272128 FORWARD LENGTH=843	1.43405	0.0403403	Up-regulated
At5g20635.1	FUNCTIONS IN: molecular_function unknown; INVOLVED IN: biological_process unknown; LOCATED IN: keratin filament, chloroplast; CONTAINS InterPro DOMAIN/s: Keratin, high sulphur B2 protein (InterPro:IPR002494); Has 6153 Blast hits to 2882 proteins in 265 species: Archae - 6; Bacteria - 47; Metazoa - 4777; Fungi - 68; Plants - 187; Viruses - 30; Other Eukaryotes - 1038 (source: NCBI BLink). | chr5:6…	1.43002	0.0383138	Up-regulated
At5g39220.1	alpha/beta-Hydrolases superfamily protein | chr5:15705913-15708039 FORWARD LENGTH=993	1.4273	0.0402641	Up-regulated
At2g43530.1	Scorpion toxin-like knottin superfamily protein | chr2:18070104-18070523 FORWARD LENGTH=258	1.42194	0.0385447	Up-regulated
At5g46795.1	MSP2 | microspore-specific promoter 2 | chr5:18987055-18988168 REVERSE LENGTH=579	1.42005	0.038477	Up-regulated
At3g05150.1	Major facilitator superfamily protein | chr3:1440216-1443361 FORWARD LENGTH=1413	1.41808	0.0432211	Up-regulated
At3g19390.1	Granulin repeat cysteine protease family protein | chr3:6723024-6724768 FORWARD LENGTH=1359	1.41782	0.0389486	Up-regulated
At3g19270.1	CYP707A4 | cytochrome P450, family 707, subfamily A, polypeptide 4 | chr3:6673885-6676400 REVERSE LENGTH=1407	1.41748	0.0410137	Up-regulated
At2g18460.2	NA	1.41711	0.0498044	Up-regulated
At5g46880.1	HB-7, HDG5 | homeobox-7 | chr5:19031540-19035388 FORWARD LENGTH=2481	1.41701	0.0412766	Up-regulated
At1g71680.1	Transmembrane amino acid transporter family protein | chr1:26944671-26946731 FORWARD LENGTH=1347	1.41668	0.0479754	Up-regulated
At1g26720.1	unknown protein; FUNCTIONS IN: molecular_function unknown; INVOLVED IN: biological_process unknown; LOCATED IN: endomembrane system; BEST Arabidopsis thaliana protein match is: unknown protein (TAIR:AT1G26710.1); Has 9 Blast hits to 9 proteins in 2 species: Archae - 0; Bacteria - 0; Metazoa - 0; Fungi - 0; Plants - 9; Viruses - 0; Other Eukaryotes - 0 (source: NCBI BLink). | chr1:9234303-9234812 …	1.41593	0.0398948	Up-regulated
At3g52270.1	Transcription initiation factor IIF, beta subunit | chr3:19387180-19388902 REVERSE LENGTH=810	1.41521	0.0439228	Up-regulated
At1g25083.1	Glutamine amidotransferase type 1 family protein | chr1:8808674-8810443 REVERSE LENGTH=669	1.41479	0.0404615	Up-regulated
At1g16330.1	CYCB3;1 | cyclin b3;1 | chr1:5582387-5587391 REVERSE LENGTH=1947	1.40576	0.0401816	Up-regulated
At4g36920.1	AP2, FLO2, FL1 | Integrase-type DNA-binding superfamily protein | chr4:17400998-17403140 FORWARD LENGTH=1299	1.40549	0.0403912	Up-regulated
At4g13230.1	Late embryogenesis abundant protein (LEA) family protein | chr4:7675841-7676629 REVERSE LENGTH=363	1.40437	0.0458319	Up-regulated
At5g41070.1	DRB5 | dsRNA-binding protein 5 | chr5:16438547-16439916 FORWARD LENGTH=1182	1.40282	0.0411136	Up-regulated
At3g30775.1	ERD5, PRODH, AT-POX, ATPOX, ATPDH, PRO1 | Methylenetetrahydrofolate reductase family protein | chr3:12448880-12451126 REVERSE LENGTH=1500	1.40085	0.0452348	Up-regulated
At1g06620.1	2-oxoglutarate (2OG) and Fe(II)-dependent oxygenase superfamily protein | chr1:2025618-2027094 FORWARD LENGTH=1098	1.39778	0.0403152	Up-regulated
At5g52390.1	PAR1 protein | chr5:21264281-21265173 REVERSE LENGTH=588	1.39324	0.0404526	Up-regulated
At1g80710.1	DRS1 | DROUGHT SENSITIVE 1 | chr1:30333499-30335796 REVERSE LENGTH=1551	1.39262	0.0424348	Up-regulated
At3g22880.1	ATDMC1, DMC1, ARLIM15 | DNA repair (Rad51) family protein | chr3:8097948-8100740 REVERSE LENGTH=1035	1.392	0.0487508	Up-regulated
At1g53130.1	GRI | Stigma-specific Stig1 family protein | chr1:19794947-19795453 REVERSE LENGTH=507	1.39036	0.0410977	Up-regulated
At5g13670.1	nodulin MtN21 /EamA-like transporter family protein | chr5:4407205-4408955 REVERSE LENGTH=1134	1.38264	0.0442473	Up-regulated
At3g51070.1	S-adenosyl-L-methionine-dependent methyltransferases superfamily protein | chr3:18969068-18972291 FORWARD LENGTH=2688	1.38095	0.0424298	Up-regulated
At1g66760.1	MATE efflux family protein | chr1:24902110-24904054 FORWARD LENGTH=1401	1.37898	0.0457727	Up-regulated
At4g23800.1	HMG (high mobility group) box protein | chr4:12390228-12392516 FORWARD LENGTH=1371	1.37821	0.0423842	Up-regulated
At5g50335.1	unknown protein; Has 30201 Blast hits to 17322 proteins in 780 species: Archae - 12; Bacteria - 1396; Metazoa - 17338; Fungi - 3422; Plants - 5037; Viruses - 0; Other Eukaryotes - 2996 (source: NCBI BLink). | chr5:20489391-20489615 REVERSE LENGTH=225	1.37712	0.0439746	Up-regulated
At3g02310.1	SEP2, AGL4 | K-box region and MADS-box transcription factor family protein | chr3:464554-466687 REVERSE LENGTH=753	1.3754	0.0452723	Up-regulated
At4g30130.1	Protein of unknown function (DUF630 and DUF632) | chr4:14735401-14737793 FORWARD LENGTH=2178	1.37522	0.0439645	Up-regulated
At1g07540.1	TRFL2 | TRF-like 2 | chr1:2318433-2321048 REVERSE LENGTH=1893	1.37511	0.0446586	Up-regulated
At3g63100.1	NA	1.37503	0.0442192	Up-regulated
At1g54870.1	NAD(P)-binding Rossmann-fold superfamily protein | chr1:20459011-20460417 FORWARD LENGTH=1008	1.37371	0.0480539	Up-regulated
At1g79360.1	ATOCT2, OCT2, 2-Oct | organic cation/carnitine transporter 2 | chr1:29854140-29855723 REVERSE LENGTH=1584	1.36984	0.0453344	Up-regulated
At3g08770.1	LTP6 | lipid transfer protein 6 | chr3:2664349-2664784 REVERSE LENGTH=342	1.3671	0.0480362	Up-regulated
At1g23010.1	LPR1 | Cupredoxin superfamily protein | chr1:8147353-8149580 FORWARD LENGTH=1746	1.36146	0.0440706	Up-regulated
At3g52630.1	Nucleic acid-binding, OB-fold-like protein | chr3:19514184-19514596 FORWARD LENGTH=324	1.3573	0.048978	Up-regulated
At4g27260.1	GH3.5, WES1 | Auxin-responsive GH3 family protein | chr4:13653704-13655892 FORWARD LENGTH=1839	1.35437	0.0438446	Up-regulated
At2g40670.1	ARR16, RR16 | response regulator 16 | chr2:16970258-16971120 FORWARD LENGTH=495	1.35291	0.0456401	Up-regulated
At3g23890.1	TOPII, ATTOPII | topoisomerase II | chr3:8624931-8631106 FORWARD LENGTH=4422	1.35251	0.0450801	Up-regulated
At5g57720.1	AP2/B3-like transcriptional factor family protein | chr5:23389927-23391526 REVERSE LENGTH=903	1.35065	0.0443301	Up-regulated
At3g55100.1	ABC-2 type transporter family protein | chr3:20420352-20422340 REVERSE LENGTH=1989	1.35012	0.0474712	Up-regulated
At2g26760.1	CYCB1;4 | Cyclin B1;4 | chr2:11401551-11403205 FORWARD LENGTH=1164	1.34552	0.0458112	Up-regulated
At1g75880.1	SGNH hydrolase-type esterase superfamily protein | chr1:28490564-28492298 FORWARD LENGTH=1128	1.34345	0.0454112	Up-regulated
At5g59845.1	Gibberellin-regulated family protein | chr5:24111443-24111808 FORWARD LENGTH=270	1.34184	0.0486094	Up-regulated
At4g18360.1	Aldolase-type TIM barrel family protein | chr4:10146141-10148386 REVERSE LENGTH=1107	1.3404	0.0451589	Up-regulated
At1g14440.1	AtHB31, HB31, ZHD4 | homeobox protein 31 | chr1:4939076-4940014 REVERSE LENGTH=939	1.33619	0.0457136	Up-regulated
At3g55660.1	ATROPGEF6, ROPGEF6 | ROP (rho of plants) guanine nucleotide exchange factor 6 | chr3:20649051-20651290 REVERSE LENGTH=1740	1.33426	0.0457415	Up-regulated
At3g42850.1	Mevalonate/galactokinase family protein | chr3:14940114-14945291 REVERSE LENGTH=2895	1.33145	0.0490327	Up-regulated
At4g22753.1	SMO1-3, ATSMO1, SMO1, ATSMO1-3 | sterol 4-alpha methyl oxidase 1-3 | chr4:11952019-11953609 REVERSE LENGTH=876	1.32987	0.0455995	Up-regulated
At1g02470.1	Polyketide cyclase/dehydrase and lipid transport superfamily protein | chr1:511916-513573 REVERSE LENGTH=663	1.3296	0.0478032	Up-regulated
At1g44760.1	Adenine nucleotide alpha hydrolases-like superfamily protein | chr1:16896894-16898427 REVERSE LENGTH=642	1.32489	0.0457839	Up-regulated
At3g57150.1	NAP57, AtNAP57, CBF5, AtCBF5 | homologue of NAP57 | chr3:21154255-21155952 REVERSE LENGTH=1698	1.32225	0.0480547	Up-regulated
At3g59670.1	unknown protein; BEST Arabidopsis thaliana protein match is: unknown protein (TAIR:AT4G37440.2); Has 77 Blast hits to 77 proteins in 14 species: Archae - 0; Bacteria - 0; Metazoa - 0; Fungi - 0; Plants - 73; Viruses - 0; Other Eukaryotes - 4 (source: NCBI BLink). | chr3:22040485-22042380 FORWARD LENGTH=1554	1.32097	0.0485551	Up-regulated
At3g26330.1	CYP71B37 | cytochrome P450, family 71, subfamily B, polypeptide 37 | chr3:9646873-9648536 REVERSE LENGTH=1503	1.31818	0.0478637	Up-regulated
At1g26945.1	KDR | basic helix-loop-helix (bHLH) DNA-binding superfamily protein | chr1:9351571-9352474 FORWARD LENGTH=285	1.31433	0.047508	Up-regulated
At3g46170.1	NAD(P)-binding Rossmann-fold superfamily protein | chr3:16952723-16953589 REVERSE LENGTH=867	1.31416	0.0474943	Up-regulated
At4g37240.1	unknown protein; FUNCTIONS IN: molecular_function unknown; INVOLVED IN: N-terminal protein myristoylation; LOCATED IN: cellular_component unknown; EXPRESSED IN: 22 plant structures; EXPRESSED DURING: 13 growth stages; BEST Arabidopsis thaliana protein match is: unknown protein (TAIR:AT2G23690.1); Has 30201 Blast hits to 17322 proteins in 780 species: Archae - 12; Bacteria - 1396; Metazoa - 17338;…	1.31343	0.047757	Up-regulated
At2g05530.1	Glycine-rich protein family | chr2:2029755-2030320 FORWARD LENGTH=348	1.30493	0.0499786	Up-regulated
At3g58240.1	TRAF-like superfamily protein | chr3:21568530-21569827 REVERSE LENGTH=954	1.3	0.0487575	Up-regulated
At1g50400.1	Eukaryotic porin family protein | chr1:18668155-18670322 FORWARD LENGTH=933	1.29883	0.0497657	Up-regulated
At3g44750.1	HD2A, ATHD2A, HDA3, HDT1 | histone deacetylase 3 | chr3:16298045-16299585 FORWARD LENGTH=738	1.28802	0.0499787	Up-regulated
At4g27800.1	TAP38, PPH1 | thylakoid-associated phosphatase 38 | chr4:13852013-13854091 REVERSE LENGTH=1167	-1.22553	0.0499907	Down-regulated
At2g28890.1	PLL4 | poltergeist like 4 | chr2:12405799-12408062 REVERSE LENGTH=1965	-1.22611	0.0491747	Down-regulated
At3g02730.1	TRXF1, ATF1 | thioredoxin F-type 1 | chr3:588570-589591 REVERSE LENGTH=537	-1.23073	0.0487468	Down-regulated
At3g22415.1	unknown protein; Has 35333 Blast hits to 34131 proteins in 2444 species: Archae - 798; Bacteria - 22429; Metazoa - 974; Fungi - 991; Plants - 531; Viruses - 0; Other Eukaryotes - 9610 (source: NCBI BLink). | chr3:7941337-7941540 FORWARD LENGTH=204	-1.23766	0.0481632	Down-regulated
At5g50400.1	ATPAP27, PAP27 | purple acid phosphatase 27 | chr5:20523575-20526231 REVERSE LENGTH=1836	-1.23875	0.0484891	Down-regulated
At5g58782.1	Undecaprenyl pyrophosphate synthetase family protein | chr5:23738306-23739430 REVERSE LENGTH=870	-1.24168	0.0489693	Down-regulated
At4g31450.1	RING/U-box superfamily protein | chr4:15255955-15257977 REVERSE LENGTH=1494	-1.24181	0.0481536	Down-regulated
AtCg00890.1	NDHB.1 | NADH-Ubiquinone/plastoquinone (complex I) protein | chrC:94941-96795 REVERSE LENGTH=1170	-1.24629	0.043202	Down-regulated
At5g28490.1	LSH1 | Protein of unknown function (DUF640) | chr5:10454541-10455113 REVERSE LENGTH=573	-1.24781	0.0467627	Down-regulated
At2g21330.1	FBA1 | fructose-bisphosphate aldolase 1 | chr2:9128416-9130152 REVERSE LENGTH=1200	-1.24814	0.0482202	Down-regulated
At3g27390.1	unknown protein; FUNCTIONS IN: molecular_function unknown; INVOLVED IN: biological_process unknown; LOCATED IN: plasma membrane; EXPRESSED IN: 23 plant structures; EXPRESSED DURING: 13 growth stages; BEST Arabidopsis thaliana protein match is: unknown protein (TAIR:AT5G40640.1); Has 101 Blast hits to 99 proteins in 12 species: Archae - 0; Bacteria - 0; Metazoa - 0; Fungi - 0; Plants - 101; Viruse…	-1.24909	0.0473361	Down-regulated
At5g49740.1	ATFRO7, FRO7 | ferric reduction oxidase 7 | chr5:20205549-20208628 REVERSE LENGTH=2244	-1.25215	0.048854	Down-regulated
At1g51500.1	CER5, D3, ABCG12, WBC12, ATWBC12 | ABC-2 type transporter family protein | chr1:19097967-19100972 REVERSE LENGTH=2064	-1.25247	0.0480558	Down-regulated
At5g65925.1	unknown protein; BEST Arabidopsis thaliana protein match is: unknown protein (TAIR:AT3G49820.1); Has 45 Blast hits to 45 proteins in 6 species: Archae - 0; Bacteria - 0; Metazoa - 0; Fungi - 0; Plants - 45; Viruses - 0; Other Eukaryotes - 0 (source: NCBI BLink). | chr5:26369122-26369574 FORWARD LENGTH=453	-1.25264	0.048094	Down-regulated
At1g01120.1	KCS1 | 3-ketoacyl-CoA synthase 1 | chr1:57392-58978 REVERSE LENGTH=1587	-1.25576	0.0471502	Down-regulated
At3g42950.1	Pectin lyase-like superfamily protein | chr3:15015383-15017800 FORWARD LENGTH=1455	-1.25678	0.0465267	Down-regulated
At2g26695.1	Ran BP2/NZF zinc finger-like superfamily protein | chr2:11365275-11365789 FORWARD LENGTH=417	-1.25715	0.0483991	Down-regulated
At5g11100.1	SYTD, ATSYTD, NTMC2TYPE2.2, NTMC2T2.2, SYT4 | Calcium-dependent lipid-binding (CaLB domain) family protein | chr5:3532402-3535221 FORWARD LENGTH=1710	-1.25961	0.0462879	Down-regulated
At5g67390.1	unknown protein; BEST Arabidopsis thaliana protein match is: Plant protein of unknown function (DUF863) (TAIR:AT1G69360.1); Has 1807 Blast hits to 1807 proteins in 277 species: Archae - 0; Bacteria - 0; Metazoa - 736; Fungi - 347; Plants - 385; Viruses - 0; Other Eukaryotes - 339 (source: NCBI BLink). | chr5:26887883-26888512 REVERSE LENGTH=531	-1.26233	0.047497	Down-regulated
AtCg00330.1	RPS14 | chloroplast ribosomal protein S14 | chrC:36938-37240 REVERSE LENGTH=303	-1.2638	0.0484722	Down-regulated
At2g01910.1	ATMAP65-6, MAP65-6 | Microtubule associated protein (MAP65/ASE1) family protein | chr2:417191-420182 FORWARD LENGTH=1827	-1.26511	0.044988	Down-regulated
At3g22560.1	Acyl-CoA N-acyltransferases (NAT) superfamily protein | chr3:7998915-7999442 REVERSE LENGTH=528	-1.26575	0.0455967	Down-regulated
At5g05840.1	Protein of unknown function (DUF620) | chr5:1757268-1760458 REVERSE LENGTH=1320	-1.26801	0.0445406	Down-regulated
At5g58900.1	Homeodomain-like transcriptional regulator | chr5:23783275-23784667 REVERSE LENGTH=867	-1.26813	0.0481973	Down-regulated
At1g76040.2	CPK29 | calcium-dependent protein kinase 29 | chr1:28537743-28540448 FORWARD LENGTH=1686	-1.26892	0.0458019	Down-regulated
At5g04710.1	Zn-dependent exopeptidases superfamily protein | chr5:1357273-1360128 REVERSE LENGTH=1581	-1.26976	0.0482153	Down-regulated
At1g09350.1	AtGolS3, GolS3 | galactinol synthase 3 | chr1:3019888-3021214 FORWARD LENGTH=1005	-1.27044	0.0482333	Down-regulated
At4g23880.1	unknown protein; Has 73 Blast hits to 69 proteins in 22 species: Archae - 0; Bacteria - 4; Metazoa - 9; Fungi - 2; Plants - 18; Viruses - 0; Other Eukaryotes - 40 (source: NCBI BLink). | chr4:12415789-12416388 REVERSE LENGTH=600	-1.27081	0.0441057	Down-regulated
At5g04220.1	SYTC, ATSYTC, NTMC2TYPE1.3, NTMC2T1.3, SYT3 | Calcium-dependent lipid-binding (CaLB domain) family protein | chr5:1155985-1157366 REVERSE LENGTH=957	-1.27091	0.0449389	Down-regulated
At5g10930.1	CIPK5, SnRK3.24 | CBL-interacting protein kinase 5 | chr5:3445569-3446906 REVERSE LENGTH=1338	-1.27258	0.0470877	Down-regulated
At5g63160.1	BT1 | BTB and TAZ domain protein 1 | chr5:25333485-25335399 REVERSE LENGTH=1098	-1.27274	0.0464325	Down-regulated
At3g48420.1	Haloacid dehalogenase-like hydrolase (HAD) superfamily protein | chr3:17929743-17931551 FORWARD LENGTH=960	-1.27444	0.0466528	Down-regulated
At5g45970.1	ARAC2, RAC2, ROP7, ATRAC2, ATROP7 | RAC-like 2 | chr5:18643761-18645758 FORWARD LENGTH=606	-1.27554	0.0443073	Down-regulated
At3g12320.1	unknown protein; BEST Arabidopsis thaliana protein match is: unknown protein (TAIR:AT5G06980.4); Has 102 Blast hits to 102 proteins in 16 species: Archae - 0; Bacteria - 0; Metazoa - 0; Fungi - 0; Plants - 98; Viruses - 0; Other Eukaryotes - 4 (source: NCBI BLink). | chr3:3924034-3925262 FORWARD LENGTH=810	-1.27666	0.0444202	Down-regulated
At2g20190.1	ATCLASP, CLASP | CLIP-associated protein | chr2:8711862-8718813 REVERSE LENGTH=4320	-1.27867	0.0441403	Down-regulated
At4g15430.1	ERD (early-responsive to dehydration stress) family protein | chr4:8828214-8831354 FORWARD LENGTH=2286	-1.28221	0.0443663	Down-regulated
At1g15410.1	aspartate-glutamate racemase family | chr1:5299577-5300681 FORWARD LENGTH=993	-1.28359	0.04503	Down-regulated
At1g06430.1	FTSH8 | FTSH protease 8 | chr1:1960214-1962525 REVERSE LENGTH=2058	-1.28607	0.04637	Down-regulated
At3g10420.2	SPD1 | P-loop containing nucleoside triphosphate hydrolases superfamily protein | chr3:3239307-3242274 FORWARD LENGTH=2055	-1.28725	0.0476756	Down-regulated
At5g17330.1	GAD, GAD1 | glutamate decarboxylase | chr5:5711141-5714839 FORWARD LENGTH=1509	-1.28757	0.048324	Down-regulated
At5g49730.1	ATFRO6, FRO6 | ferric reduction oxidase 6 | chr5:20201355-20204455 REVERSE LENGTH=2217	-1.28859	0.0437194	Down-regulated
At5g23860.1	TUB8 | tubulin beta 8 | chr5:8042962-8044528 FORWARD LENGTH=1350	-1.28925	0.0432551	Down-regulated
At5g20960.1	AAO1, AO1, ATAO, AT-AO1, AOalpha, AtAO1 | aldehyde oxidase 1 | chr5:7116783-7122338 FORWARD LENGTH=4107	-1.29047	0.0463972	Down-regulated
At4g37080.2	Protein of unknown function, DUF547 | chr4:17473719-17476716 FORWARD LENGTH=1833	-1.29142	0.042217	Down-regulated
At3g59690.1	IQD13 | IQ-domain 13 | chr3:22049572-22051479 FORWARD LENGTH=1554	-1.29166	0.0455065	Down-regulated
At2g36970.1	UDP-Glycosyltransferase superfamily protein | chr2:15529050-15530712 FORWARD LENGTH=1473	-1.29277	0.0440264	Down-regulated
At4g00750.1	S-adenosyl-L-methionine-dependent methyltransferases superfamily protein | chr4:314405-317507 FORWARD LENGTH=1902	-1.2939	0.043815	Down-regulated
At1g74740.1	CPK30, CDPK1A, ATCPK30 | calcium-dependent protein kinase 30 | chr1:28080199-28082476 REVERSE LENGTH=1626	-1.29426	0.0430569	Down-regulated
AtCg00540.1	PETA | photosynthetic electron transfer A | chrC:61657-62619 FORWARD LENGTH=963	-1.29516	0.0464309	Down-regulated
At1g32780.1	GroES-like zinc-binding dehydrogenase family protein | chr1:11869977-11872595 REVERSE LENGTH=1185	-1.2961	0.0443691	Down-regulated
At1g72030.1	Acyl-CoA N-acyltransferases (NAT) superfamily protein | chr1:27110887-27111825 FORWARD LENGTH=771	-1.29739	0.044151	Down-regulated
At5g49630.1	AAP6 | amino acid permease 6 | chr5:20142681-20146441 REVERSE LENGTH=1446	-1.2982	0.0437075	Down-regulated
At5g25830.1	GATA12 | GATA transcription factor 12 | chr5:9004398-9005502 REVERSE LENGTH=996	-1.29853	0.0437387	Down-regulated
At2g04850.1	Auxin-responsive family protein | chr2:1704298-1705608 FORWARD LENGTH=1215	-1.3025	0.0421419	Down-regulated
At5g57785.1	unknown protein; Has 30201 Blast hits to 17322 proteins in 780 species: Archae - 12; Bacteria - 1396; Metazoa - 17338; Fungi - 3422; Plants - 5037; Viruses - 0; Other Eukaryotes - 2996 (source: NCBI BLink). | chr5:23409105-23409326 REVERSE LENGTH=222	-1.30425	0.0425156	Down-regulated
At4g39350.1	CESA2, ATH-A, ATCESA2 | cellulose synthase A2 | chr4:18297078-18301890 FORWARD LENGTH=3255	-1.30793	0.0393151	Down-regulated
At5g40020.1	Pathogenesis-related thaumatin superfamily protein | chr5:16022896-16024294 REVERSE LENGTH=771	-1.31033	0.0420703	Down-regulated
At5g25890.1	IAA28, IAR2 | indole-3-acetic acid inducible 28 | chr5:9033480-9034554 FORWARD LENGTH=528	-1.31066	0.0442422	Down-regulated
At5g61660.1	glycine-rich protein | chr5:24779458-24779862 REVERSE LENGTH=405	-1.31158	0.0407352	Down-regulated
At2g16980.1	Major facilitator superfamily protein | chr2:7376376-7380525 FORWARD LENGTH=1227	-1.31429	0.040633	Down-regulated
At5g06510.1	NF-YA10 | nuclear factor Y, subunit A10 | chr5:1985439-1986591 FORWARD LENGTH=810	-1.31448	0.0400898	Down-regulated
At5g25820.1	Exostosin family protein | chr5:8997248-8999574 REVERSE LENGTH=1965	-1.31536	0.0443469	Down-regulated
At2g32440.1	KAO2, CYP88A4, ATKAO2 | ent-kaurenoic acid hydroxylase 2 | chr2:13775668-13777783 FORWARD LENGTH=1470	-1.3162	0.0409354	Down-regulated
At1g62990.1	KNAT7, IXR11 | KNOTTED-like homeobox of Arabidopsis thaliana 7 | chr1:23337468-23340348 FORWARD LENGTH=876	-1.31633	0.0417337	Down-regulated
At5g46115.1	unknown protein; Has 30201 Blast hits to 17322 proteins in 780 species: Archae - 12; Bacteria - 1396; Metazoa - 17338; Fungi - 3422; Plants - 5037; Viruses - 0; Other Eukaryotes - 2996 (source: NCBI BLink). | chr5:18701485-18701709 FORWARD LENGTH=225	-1.32263	0.0395085	Down-regulated
At2g47880.1	Glutaredoxin family protein | chr2:19605124-19605432 FORWARD LENGTH=309	-1.32278	0.0431221	Down-regulated
At1g10140.1	Uncharacterised conserved protein UCP031279 | chr1:3322970-3323473 REVERSE LENGTH=504	-1.32609	0.0429894	Down-regulated
At3g44730.1	ATKP1, KP1 | kinesin-like protein 1 | chr3:16285888-16290852 FORWARD LENGTH=3264	-1.32738	0.0387198	Down-regulated
At1g64900.1	CYP89A2, CYP89 | cytochrome P450, family 89, subfamily A, polypeptide 2 | chr1:24113283-24114803 FORWARD LENGTH=1521	-1.32858	0.0394496	Down-regulated
At3g17420.1	GPK1 | glyoxysomal protein kinase 1 | chr3:5959462-5961313 REVERSE LENGTH=1404	-1.32891	0.0388643	Down-regulated
At5g51780.1	basic helix-loop-helix (bHLH) DNA-binding superfamily protein | chr5:21034879-21036446 FORWARD LENGTH=525	-1.33031	0.0388923	Down-regulated
At1g32690.1	unknown protein; FUNCTIONS IN: molecular_function unknown; INVOLVED IN: biological_process unknown; LOCATED IN: plasma membrane; EXPRESSED IN: 21 plant structures; EXPRESSED DURING: 11 growth stages; BEST Arabidopsis thaliana protein match is: unknown protein (TAIR:AT2G35200.1); Has 45 Blast hits to 45 proteins in 8 species: Archae - 0; Bacteria - 0; Metazoa - 0; Fungi - 0; Plants - 45; Viruses -…	-1.33177	0.0384744	Down-regulated
At4g11850.1	PLDGAMMA1, MEE54 | phospholipase D gamma 1 | chr4:7129352-7132937 REVERSE LENGTH=2577	-1.33228	0.038813	Down-regulated
At4g13930.1	SHM4 | serine hydroxymethyltransferase 4 | chr4:8048013-8050021 REVERSE LENGTH=1416	-1.33254	0.0395605	Down-regulated
At5g49900.1	Beta-glucosidase, GBA2 type family protein | chr5:20297235-20302019 REVERSE LENGTH=2874	-1.33314	0.0385288	Down-regulated
At5g50950.1	FUM2 | FUMARASE 2 | chr5:20729687-20733476 FORWARD LENGTH=1533	-1.33365	0.038296	Down-regulated
At1g01430.1	TBL25 | TRICHOME BIREFRINGENCE-LIKE 25 | chr1:156953-158536 REVERSE LENGTH=1371	-1.33501	0.0383556	Down-regulated
At5g18490.1	Plant protein of unknown function (DUF946) | chr5:6134275-6136554 REVERSE LENGTH=1662	-1.33719	0.0384287	Down-regulated
At4g31530.1	NAD(P)-binding Rossmann-fold superfamily protein | chr4:15282281-15284064 FORWARD LENGTH=975	-1.3377	0.0383773	Down-regulated
At4g30460.1	glycine-rich protein | chr4:14889246-14889734 REVERSE LENGTH=489	-1.339	0.0382754	Down-regulated
At1g06090.1	Fatty acid desaturase family protein | chr1:1847921-1849500 FORWARD LENGTH=900	-1.34028	0.0383967	Down-regulated
At2g31120.1	NA	-1.34293	0.0388021	Down-regulated
At5g13730.1	SIG4, SIGD | sigma factor 4 | chr5:4429132-4430744 REVERSE LENGTH=1260	-1.34544	0.0382824	Down-regulated
At3g56170.1	CAN | Ca-2+ dependent nuclease | chr3:20842614-20844319 FORWARD LENGTH=972	-1.34593	0.0389601	Down-regulated
At4g11360.1	RHA1B | RING-H2 finger A1B | chr4:6906066-6906539 FORWARD LENGTH=474	-1.34708	0.0422544	Down-regulated
At4g12440.1	APT4 | adenine phosphoribosyl transferase 4 | chr4:7376268-7378865 FORWARD LENGTH=537	-1.34723	0.0385348	Down-regulated
At1g04570.1	Major facilitator superfamily protein | chr1:1246859-1248600 REVERSE LENGTH=1629	-1.34746	0.0384088	Down-regulated
At2g45660.1	AGL20, SOC1, ATSOC1 | AGAMOUS-like 20 | chr2:18807799-18810193 REVERSE LENGTH=645	-1.35281	0.0354779	Down-regulated
At2g20650.1	RING/U-box superfamily protein | chr2:8903954-8907017 REVERSE LENGTH=1680	-1.35446	0.036121	Down-regulated
At1g05680.1	UGT74E2 | Uridine diphosphate glycosyltransferase 74E2 | chr1:1703196-1704639 REVERSE LENGTH=1362	-1.35838	0.0444607	Down-regulated
At4g20070.1	ATAAH, AAH | allantoate amidohydrolase | chr4:10861548-10864529 FORWARD LENGTH=1578	-1.36039	0.0384919	Down-regulated
At4g39410.1	WRKY13, ATWRKY13 | WRKY DNA-binding protein 13 | chr4:18332937-18334789 REVERSE LENGTH=915	-1.36168	0.0372177	Down-regulated
At1g68010.1	HPR, ATHPR1 | hydroxypyruvate reductase | chr1:25493418-25495720 FORWARD LENGTH=1161	-1.36435	0.0388054	Down-regulated
At5g08410.1	FTRA2 | ferredoxin/thioredoxin reductase subunit A (variable subunit) 2 | chr5:2709974-2710528 REVERSE LENGTH=555	-1.36722	0.0361659	Down-regulated
At2g46690.1	SAUR-like auxin-responsive protein family | chr2:19180904-19181269 FORWARD LENGTH=366	-1.36901	0.0387077	Down-regulated
At1g68520.1	B-box type zinc finger protein with CCT domain | chr1:25709331-25710749 REVERSE LENGTH=1221	-1.3692	0.0359977	Down-regulated
At3g07570.1	Cytochrome b561/ferric reductase transmembrane with DOMON related domain | chr3:2418205-2420206 REVERSE LENGTH=1110	-1.37008	0.0372795	Down-regulated
At4g30830.1	Protein of unknown function, DUF593 | chr4:15015506-15016683 REVERSE LENGTH=1092	-1.37081	0.0369194	Down-regulated
AtCg00770.1	RPS8 | ribosomal protein S8 | chrC:80068-80472 REVERSE LENGTH=405	-1.37176	0.0464467	Down-regulated
At4g18205.1	Nucleotide-sugar transporter family protein | chr4:10073850-10075065 FORWARD LENGTH=1134	-1.3725	0.0388944	Down-regulated
At3g42628.1	phosphoenolpyruvate carboxylase-related / PEP carboxylase-related | chr3:14720735-14720872 REVERSE LENGTH=138	-1.37277	0.0389121	Down-regulated
At2g30490.1	ATC4H, C4H, CYP73A5, REF3 | cinnamate-4-hydroxylase | chr2:12993861-12995683 REVERSE LENGTH=1518	-1.37402	0.0373756	Down-regulated
At2g27420.1	Cysteine proteinases superfamily protein | chr2:11726311-11727519 REVERSE LENGTH=1047	-1.37544	0.0347067	Down-regulated
At1g80380.2	P-loop containing nucleoside triphosphate hydrolases superfamily protein | chr1:30217332-30219784 FORWARD LENGTH=1371	-1.37636	0.0349784	Down-regulated
At1g35830.1	VQ motif-containing protein | chr1:13321214-13322122 REVERSE LENGTH=909	-1.38885	0.036235	Down-regulated
At1g52855.1	unknown protein; BEST Arabidopsis thaliana protein match is: unknown protein (TAIR:AT3G15534.1); Has 35333 Blast hits to 34131 proteins in 2444 species: Archae - 798; Bacteria - 22429; Metazoa - 974; Fungi - 991; Plants - 531; Viruses - 0; Other Eukaryotes - 9610 (source: NCBI BLink). | chr1:19683137-19683343 REVERSE LENGTH=207	-1.38904	0.0362448	Down-regulated
At1g12480.1	OZS1, SLAC1, RCD3, CDI3 | C4-dicarboxylate transporter/malic acid transport protein | chr1:4257427-4259249 REVERSE LENGTH=1671	-1.3937	0.0325012	Down-regulated
At3g45290.1	MLO3, ATMLO3 | Seven transmembrane MLO family protein | chr3:16617586-16621352 FORWARD LENGTH=1527	-1.39582	0.0333493	Down-regulated
At1g55760.1	BTB/POZ domain-containing protein | chr1:20847117-20848507 REVERSE LENGTH=990	-1.40218	0.0333768	Down-regulated
At2g46100.1	Nuclear transport factor 2 (NTF2) family protein | chr2:18953326-18954467 FORWARD LENGTH=723	-1.40318	0.0337662	Down-regulated
At3g01810.1	FUNCTIONS IN: molecular_function unknown; INVOLVED IN: biological_process unknown; LOCATED IN: plasma membrane; EXPRESSED IN: 21 plant structures; EXPRESSED DURING: 13 growth stages; BEST Arabidopsis thaliana protein match is: nucleolar protein gar2-related (TAIR:AT2G42320.2); Has 1327 Blast hits to 470 proteins in 132 species: Archae - 2; Bacteria - 131; Metazoa - 139; Fungi - 114; Plants - 114;…	-1.40414	0.0311799	Down-regulated
At3g59480.1	pfkB-like carbohydrate kinase family protein | chr3:21983103-21984440 FORWARD LENGTH=981	-1.40468	0.0325015	Down-regulated
At5g03160.1	ATP58IPK, P58IPK | homolog of mamallian P58IPK | chr5:750286-752671 FORWARD LENGTH=1449	-1.40479	0.0314911	Down-regulated
At1g10155.1	ATPP2-A10, PP2-A10 | phloem protein 2-A10 | chr1:3327637-3328448 REVERSE LENGTH=555	-1.40811	0.0346971	Down-regulated
At2g03730.1	ACR5 | ACT domain repeat 5 | chr2:1137820-1139809 REVERSE LENGTH=1371	-1.40914	0.0318207	Down-regulated
At3g62730.1	unknown protein; FUNCTIONS IN: molecular_function unknown; INVOLVED IN: biological_process unknown; LOCATED IN: endomembrane system; EXPRESSED IN: 13 plant structures; EXPRESSED DURING: LP.04 four leaves visible, 4 anthesis, LP.02 two leaves visible, petal differentiation and expansion stage; BEST Arabidopsis thaliana protein match is: unknown protein (TAIR:AT1G47980.1); Has 172 Blast hits to 172…	-1.41495	0.0313558	Down-regulated
At1g11530.1	ATCXXS1, CXXS1 | C-terminal cysteine residue is changed to a serine 1 | chr1:3874518-3875311 FORWARD LENGTH=357	-1.41832	0.0331784	Down-regulated
At5g54240.1	Protein of unknown function (DUF1223) | chr5:22023339-22024461 REVERSE LENGTH=849	-1.41857	0.0444441	Down-regulated
At4g23790.1	TBL24 | TRICHOME BIREFRINGENCE-LIKE 24 | chr4:12387870-12389659 FORWARD LENGTH=1293	-1.41867	0.0300076	Down-regulated
At5g09660.1	PMDH2 | peroxisomal NAD-malate dehydrogenase 2 | chr5:2993645-2995551 REVERSE LENGTH=1065	-1.41921	0.033931	Down-regulated
At2g07727.1	Di-haem cytochrome, transmembrane;Cytochrome b/b6, C-terminal | chr2:3450863-3452044 FORWARD LENGTH=1182	-1.41921	0.0311229	Down-regulated
At5g12870.1	ATMYB46, MYB46 | myb domain protein 46 | chr5:4062939-4064939 REVERSE LENGTH=843	-1.41994	0.0304107	Down-regulated
At1g64680.1	unknown protein; BEST Arabidopsis thaliana protein match is: unknown protein (TAIR:AT1G03055.1); Has 146 Blast hits to 146 proteins in 26 species: Archae - 0; Bacteria - 6; Metazoa - 0; Fungi - 0; Plants - 125; Viruses - 0; Other Eukaryotes - 15 (source: NCBI BLink). | chr1:24036071-24037062 FORWARD LENGTH=753	-1.42302	0.031682	Down-regulated
At1g17620.1	Late embryogenesis abundant (LEA) hydroxyproline-rich glycoprotein family | chr1:6062313-6063107 FORWARD LENGTH=795	-1.42461	0.0331651	Down-regulated
At5g57630.1	CIPK21, SnRK3.4 | CBL-interacting protein kinase 21 | chr5:23341092-23343143 REVERSE LENGTH=1251	-1.42561	0.0300353	Down-regulated
At1g25440.1	B-box type zinc finger protein with CCT domain | chr1:8933939-8935284 REVERSE LENGTH=1254	-1.4291	0.0323836	Down-regulated
At5g01220.1	SQD2 | sulfoquinovosyldiacylglycerol 2 | chr5:86907-89885 REVERSE LENGTH=1533	-1.42996	0.0304532	Down-regulated
At2g42600.2	ATPPC2, PPC2 | phosphoenolpyruvate carboxylase 2 | chr2:17734541-17738679 REVERSE LENGTH=2892	-1.43043	0.0314331	Down-regulated
At3g16340.1	ATPDR1, PDR1 | pleiotropic drug resistance 1 | chr3:5539897-5546263 FORWARD LENGTH=4251	-1.43435	0.0313224	Down-regulated
At2g31990.1	Exostosin family protein | chr2:13611500-13613551 REVERSE LENGTH=1440	-1.43496	0.0313752	Down-regulated
At1g79510.1	Uncharacterized conserved protein (DUF2358) | chr1:29908271-29909175 REVERSE LENGTH=828	-1.43555	0.0313728	Down-regulated
At1g21680.1	DPP6 N-terminal domain-like protein | chr1:7613028-7615148 FORWARD LENGTH=2121	-1.43575	0.0290736	Down-regulated
At5g63130.1	Octicosapeptide/Phox/Bem1p family protein | chr5:25323190-25323857 FORWARD LENGTH=579	-1.43784	0.0353032	Down-regulated
At3g23430.1	PHO1, ATPHO1 | phosphate 1 | chr3:8387818-8393242 REVERSE LENGTH=2349	-1.43942	0.0297968	Down-regulated
At1g22410.1	Class-II DAHP synthetase family protein | chr1:7912120-7914742 FORWARD LENGTH=1584	-1.44388	0.029076	Down-regulated
At2g35860.1	FLA16 | FASCICLIN-like arabinogalactan protein 16 precursor | chr2:15059859-15061810 FORWARD LENGTH=1338	-1.44443	0.0297929	Down-regulated
At5g06730.1	Peroxidase superfamily protein | chr5:2080207-2081621 REVERSE LENGTH=1077	-1.44628	0.0338189	Down-regulated
At1g55960.1	Polyketide cyclase/dehydrase and lipid transport superfamily protein | chr1:20927962-20929825 REVERSE LENGTH=1212	-1.44702	0.0290401	Down-regulated
At5g46340.1	O-acetyltransferase family protein | chr5:18796361-18799725 REVERSE LENGTH=1623	-1.44734	0.0291	Down-regulated
At5g37300.1	WSD1 | O-acyltransferase (WSD1-like) family protein | chr5:14767514-14770058 FORWARD LENGTH=1446	-1.44767	0.0283247	Down-regulated
At5g03760.1	ATCSLA09, CSLA09, ATCSLA9, CSLA9, RAT4 | Nucleotide-diphospho-sugar transferases superfamily protein | chr5:985910-990087 REVERSE LENGTH=1602	-1.45006	0.0291849	Down-regulated
At1g62250.2	unknown protein; LOCATED IN: chloroplast; EXPRESSED IN: 23 plant structures; EXPRESSED DURING: 15 growth stages; Has 35333 Blast hits to 34131 proteins in 2444 species: Archae - 798; Bacteria - 22429; Metazoa - 974; Fungi - 991; Plants - 531; Viruses - 0; Other Eukaryotes - 9610 (source: NCBI BLink). | chr1:22996054-22997003 REVERSE LENGTH=672	-1.45273	0.0304152	Down-regulated
At5g55950.1	Nucleotide/sugar transporter family protein | chr5:22658411-22660253 REVERSE LENGTH=1197	-1.45288	0.0282956	Down-regulated
At3g05270.1	Plant protein of unknown function (DUF869) | chr3:1500803-1502926 REVERSE LENGTH=1848	-1.45582	0.028445	Down-regulated
At3g24503.1	ALDH2C4, ALDH1A, REF1 | aldehyde dehydrogenase 2C4 | chr3:8919732-8923029 REVERSE LENGTH=1506	-1.46086	0.0282932	Down-regulated
At5g16600.1	MYB43, AtMYB43 | myb domain protein 43 | chr5:5438291-5440214 FORWARD LENGTH=984	-1.46685	0.0276904	Down-regulated
At5g42690.1	Protein of unknown function, DUF547 | chr5:17116630-17119492 REVERSE LENGTH=1620	-1.4704	0.0268509	Down-regulated
At5g06330.1	Late embryogenesis abundant (LEA) hydroxyproline-rich glycoprotein family | chr5:1934961-1935584 REVERSE LENGTH=624	-1.47239	0.02715	Down-regulated
At4g31140.1	O-Glycosyl hydrolases family 17 protein | chr4:15141581-15143188 FORWARD LENGTH=1455	-1.47556	0.0275179	Down-regulated
At3g05410.1	Photosystem II reaction center PsbP family protein | chr3:1554783-1555399 FORWARD LENGTH=534	-1.47869	0.0288469	Down-regulated
At3g04000.1	NAD(P)-binding Rossmann-fold superfamily protein | chr3:1035500-1036435 FORWARD LENGTH=819	-1.48078	0.0279966	Down-regulated
At1g31440.1	SH3 domain-containing protein | chr1:11256150-11258479 REVERSE LENGTH=1320	-1.48353	0.026709	Down-regulated
At1g28080.1	RING finger protein | chr1:9789826-9790918 FORWARD LENGTH=876	-1.48575	0.026762	Down-regulated
AtCg00180.1	RPOC1 | DNA-directed RNA polymerase family protein | chrC:20251-23084 REVERSE LENGTH=2043	-1.48652	0.0313856	Down-regulated
At1g55610.1	BRL1 | BRI1 like | chr1:20779874-20783374 REVERSE LENGTH=3501	-1.48712	0.0265577	Down-regulated
At1g28680.1	HXXXD-type acyl-transferase family protein | chr1:10078222-10079763 FORWARD LENGTH=1356	-1.48789	0.0284742	Down-regulated
At4g10310.1	HKT1, ATHKT1 | high-affinity K+ transporter 1 | chr4:6392008-6395667 FORWARD LENGTH=1521	-1.48991	0.0292046	Down-regulated
At3g33000.1	pseudogene pseudogene, ATP synthase A subunit, blastp match of 68% identity and 1.3e-82 P-value to SP|P06288|ATPI_TOBAC ATP synthase A chain precursor (EC 3.6.3.14) (Subunit IV). (Belladonna, Deadly nightshade) {Atropa belladonna}	-1.49131	0.0299553	Down-regulated
At3g03470.1	CYP89A9 | cytochrome P450, family 87, subfamily A, polypeptide 9 | chr3:824692-826345 REVERSE LENGTH=1536	-1.49495	0.0265436	Down-regulated
At4g33010.1	AtGLDP1, GLDP1 | glycine decarboxylase P-protein 1 | chr4:15926852-15931150 REVERSE LENGTH=3114	-1.49498	0.0264943	Down-regulated
At5g54500.1	FQR1 | flavodoxin-like quinone reductase 1 | chr5:22124674-22126256 FORWARD LENGTH=615	-1.49858	0.0276199	Down-regulated
At4g28080.1	Tetratricopeptide repeat (TPR)-like superfamily protein | chr4:13948993-13957840 REVERSE LENGTH=5460	-1.49887	0.0289424	Down-regulated
At5g02420.1	unknown protein; Has 90 Blast hits to 90 proteins in 10 species: Archae - 0; Bacteria - 0; Metazoa - 0; Fungi - 0; Plants - 90; Viruses - 0; Other Eukaryotes - 0 (source: NCBI BLink). | chr5:523501-523848 FORWARD LENGTH=348	-1.50213	0.0259593	Down-regulated
At4g17220.1	ATMAP70-5, MAP70-5 | microtubule-associated proteins 70-5 | chr4:9657008-9659405 REVERSE LENGTH=1542	-1.50288	0.0458329	Down-regulated
At5g38510.1	Rhomboid-related intramembrane serine protease family protein | chr5:15417839-15420002 REVERSE LENGTH=1305	-1.5047	0.0252731	Down-regulated
At1g13830.1	Carbohydrate-binding X8 domain superfamily protein | chr1:4739999-4740926 REVERSE LENGTH=594	-1.50997	0.0264771	Down-regulated
At2g21140.1	ATPRP2, PRP2 | proline-rich protein 2 | chr2:9060868-9062035 REVERSE LENGTH=966	-1.51365	0.0256506	Down-regulated
At5g46600.1	Aluminium activated malate transporter family protein | chr5:18907849-18910742 REVERSE LENGTH=1620	-1.51387	0.0265321	Down-regulated
AtCg00170.1	RPOC2 | DNA-directed RNA polymerase family protein | chrC:15938-20068 REVERSE LENGTH=4131	-1.51429	0.0497659	Down-regulated
At2g44745.1	WRKY family transcription factor | chr2:18447482-18449004 REVERSE LENGTH=657	-1.51438	0.0266396	Down-regulated
At5g43420.1	RING/U-box superfamily protein | chr5:17451790-17452917 FORWARD LENGTH=1128	-1.51581	0.0243156	Down-regulated
At1g65480.1	FT | PEBP (phosphatidylethanolamine-binding protein) family protein | chr1:24331510-24333689 FORWARD LENGTH=528	-1.51606	0.0284253	Down-regulated
At1g78440.1	ATGA2OX1, GA2OX1 | Arabidopsis thaliana gibberellin 2-oxidase 1 | chr1:29511772-29512990 REVERSE LENGTH=990	-1.51674	0.0247536	Down-regulated
At3g25690.1	CHUP1 | Hydroxyproline-rich glycoprotein family protein | chr3:9354061-9357757 FORWARD LENGTH=3015	-1.51787	0.0268524	Down-regulated
At5g56860.1	GNC, GATA21 | GATA type zinc finger transcription factor family protein | chr5:22989630-22991351 REVERSE LENGTH=1197	-1.52319	0.0274291	Down-regulated
At5g06530.2	ABC-2 type transporter family protein | chr5:1990060-1994605 REVERSE LENGTH=2256	-1.52325	0.0246123	Down-regulated
At5g67140.1	F-box/RNI-like superfamily protein | chr5:26794009-26795213 REVERSE LENGTH=687	-1.52463	0.0268358	Down-regulated
At4g04330.1	Chaperonin-like RbcX protein | chr4:2116700-2118563 REVERSE LENGTH=525	-1.52483	0.0249864	Down-regulated
At1g11080.1	scpl31 | serine carboxypeptidase-like 31 | chr1:3694917-3697759 REVERSE LENGTH=1479	-1.52542	0.0248652	Down-regulated
At1g14190.1	Glucose-methanol-choline (GMC) oxidoreductase family protein | chr1:4852802-4854307 FORWARD LENGTH=1506	-1.53029	0.0237099	Down-regulated
At4g09990.1	Protein of unknown function (DUF579) | chr4:6259110-6260064 REVERSE LENGTH=873	-1.53277	0.0284545	Down-regulated
At3g29762.1	pseudogene pseudogene, RNA polymerase A beta prime subunit (fragment), similar to RNA polymerase A beta prime subunit GB:CAB48413 (Chloroplast Sinapis alba)	-1.53737	0.0331706	Down-regulated
At4g17280.1	Auxin-responsive family protein | chr4:9678887-9680277 REVERSE LENGTH=1209	-1.54036	0.024488	Down-regulated
At3g45160.1	Putative membrane lipoprotein | chr3:16533655-16533930 REVERSE LENGTH=276	-1.54124	0.0261203	Down-regulated
At2g43060.1	IBH1 | ILI1 binding bHLH 1 | chr2:17909247-17909717 FORWARD LENGTH=471	-1.54424	0.0249668	Down-regulated
At2g31110.1	TBL40 | Plant protein of unknown function (DUF828) | chr2:13258522-13259463 REVERSE LENGTH=651	-1.54443	0.0245416	Down-regulated
At5g06610.1	Protein of unknown function (DUF620) | chr5:2029953-2033620 FORWARD LENGTH=1107	-1.5449	0.0236389	Down-regulated
At4g36990.1	HSF4, HSFB1, AT-HSFB1, ATHSF4 | heat shock factor 4 | chr4:17440660-17441706 FORWARD LENGTH=855	-1.54497	0.0248267	Down-regulated
At4g02075.1	PIT1 | RING/FYVE/PHD zinc finger superfamily protein | chr4:913555-916414 REVERSE LENGTH=657	-1.54671	0.0238063	Down-regulated
At1g18730.1	NDF6 | NDH dependent flow 6 | chr1:6460625-6462107 FORWARD LENGTH=528	-1.54749	0.0265238	Down-regulated
At2g26870.1	NPC2 | non-specific phospholipase C2 | chr2:11457117-11459355 REVERSE LENGTH=1545	-1.54761	0.024903	Down-regulated
At2g40890.1	CYP98A3 | cytochrome P450, family 98, subfamily A, polypeptide 3 | chr2:17058291-17060532 REVERSE LENGTH=1527	-1.5489	0.0249111	Down-regulated
At1g80760.1	NIP6;1, NIP6, NLM7 | NOD26-like intrinsic protein 6;1 | chr1:30350640-30352015 REVERSE LENGTH=918	-1.54972	0.0264391	Down-regulated
At5g42930.1	alpha/beta-Hydrolases superfamily protein | chr5:17210738-17214152 REVERSE LENGTH=1404	-1.55172	0.0217927	Down-regulated
AtCg00710.1	PSBH | photosystem II reaction center protein H | chrC:74485-74706 FORWARD LENGTH=222	-1.55249	0.0244806	Down-regulated
At2g34960.1	CAT5 | cationic amino acid transporter 5 | chr2:14744175-14745884 REVERSE LENGTH=1710	-1.55837	0.022453	Down-regulated
At3g61750.1	Cytochrome b561/ferric reductase transmembrane with DOMON related domain | chr3:22857897-22859254 REVERSE LENGTH=1197	-1.56107	0.023878	Down-regulated
At1g55850.1	ATCSLE1, CSLE1 | cellulose synthase like E1 | chr1:20876752-20879414 FORWARD LENGTH=2190	-1.57208	0.0264125	Down-regulated
AtCg01120.1	RPS15 | chloroplast ribosomal protein S15 | chrC:123296-123562 REVERSE LENGTH=267	-1.57399	0.0389629	Down-regulated
At5g13170.1	SAG29, SWEET15, AtSWEET15 | senescence-associated gene 29 | chr5:4181331-4183171 REVERSE LENGTH=879	-1.57584	0.0265309	Down-regulated
At1g26810.1	GALT1 | galactosyltransferase1 | chr1:9286862-9289327 REVERSE LENGTH=1932	-1.57612	0.0209046	Down-regulated
At5g04340.1	C2H2, CZF2, ZAT6 | zinc finger of Arabidopsis thaliana 6 | chr5:1216321-1217037 REVERSE LENGTH=717	-1.57649	0.0233124	Down-regulated
At3g10520.1	AHB2, GLB2, ARATH GLB2, NSHB2, ATGLB2, HB2 | haemoglobin 2 | chr3:3276516-3277765 REVERSE LENGTH=477	-1.58041	0.0219976	Down-regulated
At5g06740.1	Concanavalin A-like lectin protein kinase family protein | chr5:2084094-2086052 FORWARD LENGTH=1959	-1.58391	0.0208979	Down-regulated
AtCg00160.1	RPS2 | ribosomal protein S2 | chrC:15013-15723 REVERSE LENGTH=711	-1.58436	0.0414021	Down-regulated
AtCg00520.1	YCF4 | unfolded protein binding | chrC:59772-60326 FORWARD LENGTH=555	-1.58764	0.0266518	Down-regulated
At3g27110.1	Peptidase family M48 family protein | chr3:9998006-9999892 FORWARD LENGTH=1035	-1.59084	0.0200987	Down-regulated
AtCg00810.1	RPL22 | ribosomal protein L22 | chrC:83467-83949 REVERSE LENGTH=483	-1.59501	0.0226632	Down-regulated
At5g06720.1	ATPA2, PA2 | peroxidase 2 | chr5:2077567-2078857 REVERSE LENGTH=1008	-1.60306	0.0213533	Down-regulated
At1g72300.1	Leucine-rich receptor-like protein kinase family protein | chr1:27217679-27220966 REVERSE LENGTH=3288	-1.60323	0.019622	Down-regulated
At2g34150.1	ATRANGAP2, ATSCAR1, SCAR1, WAVE1 | SCAR family protein | chr2:14419432-14422361 REVERSE LENGTH=2103	-1.60626	0.0214759	Down-regulated
At4g15490.1	UGT84A3 | UDP-Glycosyltransferase superfamily protein | chr4:8852864-8854303 REVERSE LENGTH=1440	-1.60705	0.0206525	Down-regulated
At5g62790.1	DXR, PDE129 | 1-deoxy-D-xylulose 5-phosphate reductoisomerase | chr5:25214358-25217292 REVERSE LENGTH=1434	-1.60722	0.0220629	Down-regulated
At2g30300.1	Major facilitator superfamily protein | chr2:12919401-12921222 FORWARD LENGTH=1503	-1.60868	0.0194	Down-regulated
At3g54040.1	PAR1 protein | chr3:20014032-20015299 REVERSE LENGTH=552	-1.61883	0.0277549	Down-regulated
At4g16370.1	ATOPT3, OPT3 | oligopeptide transporter | chr4:9247514-9250071 REVERSE LENGTH=2214	-1.62365	0.0192251	Down-regulated
At2g17710.1	unknown protein; Has 39 Blast hits to 39 proteins in 14 species: Archae - 0; Bacteria - 0; Metazoa - 0; Fungi - 0; Plants - 39; Viruses - 0; Other Eukaryotes - 0 (source: NCBI BLink). | chr2:7693856-7694554 FORWARD LENGTH=459	-1.6247	0.0208645	Down-regulated
At5g51670.1	Protein of unknown function (DUF668) | chr5:20993560-20995096 FORWARD LENGTH=1425	-1.62518	0.0185441	Down-regulated
At3g44990.1	XTR8, ATXTR8, XTH31 | xyloglucan endo-transglycosylase-related 8 | chr3:16447280-16448678 REVERSE LENGTH=882	-1.62625	0.019394	Down-regulated
At1g59590.1	ZCF37 | ZCF37 | chr1:21887860-21888495 FORWARD LENGTH=636	-1.63143	0.0195705	Down-regulated
At1g70820.1	phosphoglucomutase, putative / glucose phosphomutase, putative | chr1:26705594-26708034 FORWARD LENGTH=1848	-1.63296	0.0186951	Down-regulated
At3g03440.1	ARM repeat superfamily protein | chr3:815709-818568 FORWARD LENGTH=1227	-1.63561	0.0187574	Down-regulated
At1g63220.1	Calcium-dependent lipid-binding (CaLB domain) family protein | chr1:23449017-23450244 FORWARD LENGTH=444	-1.63874	0.018664	Down-regulated
At2g39110.1	Protein kinase superfamily protein | chr2:16319770-16321568 FORWARD LENGTH=1308	-1.64079	0.0177963	Down-regulated
At2g15020.1	unknown protein; BEST Arabidopsis thaliana protein match is: unknown protein (TAIR:AT5G64190.1); Has 72 Blast hits to 72 proteins in 10 species: Archae - 0; Bacteria - 0; Metazoa - 0; Fungi - 0; Plants - 72; Viruses - 0; Other Eukaryotes - 0 (source: NCBI BLink). | chr2:6491706-6493286 REVERSE LENGTH=1581	-1.6428	0.0179436	Down-regulated
At1g69440.1	AGO7, ZIP | Argonaute family protein | chr1:26101565-26105016 REVERSE LENGTH=2973	-1.64401	0.0186458	Down-regulated
At4g32010.1	HSL1, HSI2-L1, VAL2 | HSI2-like 1 | chr4:15481231-15484897 FORWARD LENGTH=2343	-1.64835	0.0177637	Down-regulated
At3g27650.1	LBD25 | LOB domain-containing protein 25 | chr3:10238731-10240346 FORWARD LENGTH=480	-1.64981	0.0186348	Down-regulated
At4g02420.1	Concanavalin A-like lectin protein kinase family protein | chr4:1064363-1066372 REVERSE LENGTH=2010	-1.65015	0.0178183	Down-regulated
At3g56630.1	CYP94D2 | cytochrome P450, family 94, subfamily D, polypeptide 2 | chr3:20978953-20980512 FORWARD LENGTH=1500	-1.65286	0.0186761	Down-regulated
At5g27600.1	LACS7, ATLACS7 | long-chain acyl-CoA synthetase 7 | chr5:9742616-9746795 FORWARD LENGTH=2103	-1.65367	0.0178639	Down-regulated
At2g23360.1	Plant protein of unknown function (DUF869) | chr2:9949420-9952727 FORWARD LENGTH=2697	-1.65528	0.0185781	Down-regulated
At4g15530.2	PPDK | pyruvate orthophosphate dikinase | chr4:8864828-8869183 REVERSE LENGTH=2628	-1.65728	0.0175194	Down-regulated
At4g28500.1	ANAC073, SND2, NAC073 | NAC domain containing protein 73 | chr4:14083014-14084266 FORWARD LENGTH=918	-1.65734	0.0192815	Down-regulated
At2g03200.1	Eukaryotic aspartyl protease family protein | chr2:966506-967891 REVERSE LENGTH=1386	-1.66547	0.017947	Down-regulated
At3g14170.1	Plant protein of unknown function (DUF936) | chr3:4696115-4697989 REVERSE LENGTH=1518	-1.67652	0.0168338	Down-regulated
AtCg00790.1	RPL16 | ribosomal protein L16 | chrC:81189-82652 REVERSE LENGTH=408	-1.67744	0.0192388	Down-regulated
AtCg00780.1	RPL14 | ribosomal protein L14 | chrC:80696-81064 REVERSE LENGTH=369	-1.67749	0.0176542	Down-regulated
At4g14380.1	unknown protein; Has 22 Blast hits to 22 proteins in 8 species: Archae - 0; Bacteria - 0; Metazoa - 1; Fungi - 1; Plants - 18; Viruses - 0; Other Eukaryotes - 2 (source: NCBI BLink). | chr4:8285815-8286417 FORWARD LENGTH=603	-1.67767	0.0174387	Down-regulated
At1g22690.1	Gibberellin-regulated family protein | chr1:8027328-8027961 FORWARD LENGTH=360	-1.67809	0.0174952	Down-regulated
At5g03190.1	CPUORF47 | conserved peptide upstream open reading frame 47 | chr5:758793-760148 FORWARD LENGTH=1356	-1.6783	0.0171656	Down-regulated
At2g40460.1	Major facilitator superfamily protein | chr2:16897123-16901171 FORWARD LENGTH=1752	-1.67913	0.0167769	Down-regulated
At3g08040.1	FRD3, MAN1, ATFRD3 | MATE efflux family protein | chr3:2566593-2569397 REVERSE LENGTH=1581	-1.68114	0.0174122	Down-regulated
At2g20570.1	GPRI1, GLK1, ATGLK1 | GBF's pro-rich region-interacting factor 1 | chr2:8855486-8857522 FORWARD LENGTH=1263	-1.68695	0.0164578	Down-regulated
At2g40130.1	Double Clp-N motif-containing P-loop nucleoside triphosphate hydrolases superfamily protein | chr2:16766030-16767821 FORWARD LENGTH=1476	-1.69519	0.0163901	Down-regulated
At4g36950.1	MAPKKK21 | mitogen-activated protein kinase kinase kinase 21 | chr4:17422834-17423844 REVERSE LENGTH=1011	-1.69528	0.0164936	Down-regulated
At4g12830.1	alpha/beta-Hydrolases superfamily protein | chr4:7531189-7533327 FORWARD LENGTH=1182	-1.69972	0.0156163	Down-regulated
At5g25840.1	Protein of unknown function (DUF1677) | chr5:9010909-9011430 REVERSE LENGTH=522	-1.70242	0.0168155	Down-regulated
At1g03055.1	unknown protein; BEST Arabidopsis thaliana protein match is: unknown protein (TAIR:AT1G64680.1); Has 143 Blast hits to 143 proteins in 26 species: Archae - 0; Bacteria - 6; Metazoa - 0; Fungi - 0; Plants - 122; Viruses - 0; Other Eukaryotes - 15 (source: NCBI BLink). | chr1:710102-711763 REVERSE LENGTH=795	-1.70303	0.0168722	Down-regulated
At2g34410.1	O-acetyltransferase family protein | chr2:14518719-14522053 FORWARD LENGTH=1623	-1.70404	0.016395	Down-regulated
At4g32880.1	ATHB-8, ATHB8, HB-8 | homeobox gene 8 | chr4:15863587-15867822 REVERSE LENGTH=2502	-1.7076	0.01572	Down-regulated
At3g25290.1	Auxin-responsive family protein | chr3:9208955-9210353 FORWARD LENGTH=1182	-1.71757	0.0157556	Down-regulated
At1g03010.1	Phototropic-responsive NPH3 family protein | chr1:693480-696188 FORWARD LENGTH=1905	-1.71927	0.0155919	Down-regulated
At2g41940.1	ZFP8 | zinc finger protein 8 | chr2:17507556-17508329 FORWARD LENGTH=774	-1.72358	0.0156207	Down-regulated
At4g06744.1	Leucine-rich repeat (LRR) family protein | chr4:4070870-4072084 REVERSE LENGTH=1215	-1.72384	0.0157696	Down-regulated
At5g47330.1	alpha/beta-Hydrolases superfamily protein | chr5:19207170-19208711 FORWARD LENGTH=945	-1.72681	0.0154423	Down-regulated
At5g58260.1	oxidoreductases, acting on NADH or NADPH, quinone or similar compound as acceptor | chr5:23561075-23561929 REVERSE LENGTH=630	-1.72727	0.0156379	Down-regulated
At1g15980.1	NDF1, NDH48 | NDH-dependent cyclic electron flow 1 | chr1:5489314-5491199 FORWARD LENGTH=1386	-1.72963	0.0157588	Down-regulated
At2g07600.1	pseudogene pseudogene, NADH dehydrogenase, blastp match of 71% identity and 8.1e-159 P-value to GP|17932795|emb|CAC85134.1||AJ312951 NADH dehydrogenase subunit F {Cassinopsis ilicifolia}	-1.73015	0.0185306	Down-regulated
At2g18300.1	basic helix-loop-helix (bHLH) DNA-binding superfamily protein | chr2:7953022-7954446 REVERSE LENGTH=1008	-1.73306	0.0149258	Down-regulated
At2g26750.1	alpha/beta-Hydrolases superfamily protein | chr2:11395971-11397085 REVERSE LENGTH=963	-1.7448	0.0157021	Down-regulated
At3g21230.1	4CL5 | 4-coumarate:CoA ligase 5 | chr3:7448231-7451947 REVERSE LENGTH=1713	-1.74851	0.0154599	Down-regulated
At3g15840.1	PIFI | post-illumination chlorophyll fluorescence increase | chr3:5356782-5358418 REVERSE LENGTH=807	-1.7557	0.0156825	Down-regulated
At5g55970.1	RING/U-box superfamily protein | chr5:22668019-22669312 FORWARD LENGTH=1032	-1.75899	0.0154713	Down-regulated
At1g70260.1	nodulin MtN21 /EamA-like transporter family protein | chr1:26457067-26459338 REVERSE LENGTH=1128	-1.7618	0.0143304	Down-regulated
At2g03450.1	PAP9, ATPAP9 | purple acid phosphatase 9 | chr2:1041528-1043569 FORWARD LENGTH=1956	-1.7645	0.0142667	Down-regulated
At2g37900.1	Major facilitator superfamily protein | chr2:15864396-15866408 REVERSE LENGTH=1728	-1.76631	0.0146151	Down-regulated
At3g53980.1	Bifunctional inhibitor/lipid-transfer protein/seed storage 2S albumin superfamily protein | chr3:19987760-19988203 REVERSE LENGTH=345	-1.76772	0.0143242	Down-regulated
At5g60020.1	LAC17, ATLAC17 | laccase 17 | chr5:24168072-24170223 FORWARD LENGTH=1734	-1.77213	0.0141489	Down-regulated
At1g52770.1	Phototropic-responsive NPH3 family protein | chr1:19656009-19657546 FORWARD LENGTH=1365	-1.77253	0.0142592	Down-regulated
At1g61667.1	Protein of unknown function, DUF538 | chr1:22767674-22768269 FORWARD LENGTH=471	-1.77463	0.0139793	Down-regulated
AtCg00420.1	NDHJ | NADH dehydrogenase subunit J | chrC:48677-49153 REVERSE LENGTH=477	-1.78014	0.0201168	Down-regulated
At2g28755.1	UDP-D-glucuronate carboxy-lyase-related | chr2:12334172-12334459 REVERSE LENGTH=171	-1.78194	0.0142189	Down-regulated
At2g43200.1	S-adenosyl-L-methionine-dependent methyltransferases superfamily protein | chr2:17958230-17960536 FORWARD LENGTH=1836	-1.78366	0.0136327	Down-regulated
At3g51920.1	CAM9, CML9, ATCML9 | calmodulin 9 | chr3:19268178-19269314 REVERSE LENGTH=456	-1.78442	0.0136488	Down-regulated
At4g28680.1	TYRDC, TYRDC1 | L-tyrosine decarboxylase | chr4:14155248-14158546 FORWARD LENGTH=1638	-1.78617	0.0142045	Down-regulated
At3g21870.1	CYCP2;1 | cyclin p2;1 | chr3:7703927-7704813 REVERSE LENGTH=633	-1.79376	0.0140937	Down-regulated
At5g28030.2	DES1 | L-cysteine desulfhydrase 1 | chr5:10030493-10032285 REVERSE LENGTH=972	-1.7997	0.0135834	Down-regulated
AtCg01070.1	NDHE | NADH-ubiquinone/plastoquinone oxidoreductase chain 4L | chrC:117804-118109 REVERSE LENGTH=306	-1.80211	0.0141446	Down-regulated
At2g47360.1	unknown protein; BEST Arabidopsis thaliana protein match is: unknown protein (TAIR:AT1G02570.1); Has 58 Blast hits to 55 proteins in 6 species: Archae - 0; Bacteria - 0; Metazoa - 0; Fungi - 0; Plants - 58; Viruses - 0; Other Eukaryotes - 0 (source: NCBI BLink). | chr2:19437820-19438731 FORWARD LENGTH=912	-1.80798	0.0131804	Down-regulated
At1g72220.1	RING/U-box superfamily protein | chr1:27184388-27185629 REVERSE LENGTH=1242	-1.80842	0.0140474	Down-regulated
At2g47890.2	B-box type zinc finger protein with CCT domain | chr2:19608245-19609036 FORWARD LENGTH=714	-1.81263	0.0134434	Down-regulated
At5g04140.1	GLU1, GLS1, GLUS, FD-GOGAT | glutamate synthase 1 | chr5:1130031-1138186 FORWARD LENGTH=4869	-1.81272	0.0131503	Down-regulated
AtCg00150.1	ATPI | ATPase, F0 complex, subunit A protein | chrC:14021-14770 REVERSE LENGTH=750	-1.81409	0.0136512	Down-regulated
At1g62710.1	BETA-VPE, BETAVPE | beta vacuolar processing enzyme | chr1:23224070-23226857 REVERSE LENGTH=1461	-1.81698	0.0131146	Down-regulated
At1g76080.1	ATCDSP32, CDSP32 | chloroplastic drought-induced stress protein of 32 kD | chr1:28548063-28549348 REVERSE LENGTH=909	-1.81782	0.0135235	Down-regulated
At1g66140.1	ZFP4 | zinc finger protein 4 | chr1:24620063-24620845 REVERSE LENGTH=783	-1.82605	0.012595	Down-regulated
At3g19370.1	Plant protein of unknown function (DUF869) | chr3:6711046-6713494 FORWARD LENGTH=2115	-1.83982	0.013016	Down-regulated
At2g28315.1	Nucleotide/sugar transporter family protein | chr2:12088896-12090570 FORWARD LENGTH=1029	-1.8416	0.0120382	Down-regulated
AtCg01010.1	NDHF | NADH-Ubiquinone oxidoreductase (complex I), chain 5 protein | chrC:110398-112638 REVERSE LENGTH=2241	-1.84558	0.0146696	Down-regulated
At5g23240.1	DNAJ heat shock N-terminal domain-containing protein | chr5:7826857-7828534 REVERSE LENGTH=1398	-1.84964	0.0117768	Down-regulated
At4g00360.1	CYP86A2, ATT1 | cytochrome P450, family 86, subfamily A, polypeptide 2 | chr4:160951-162778 FORWARD LENGTH=1662	-1.85321	0.0125686	Down-regulated
At5g40780.1	LHT1 | lysine histidine transporter 1 | chr5:16323823-16327082 FORWARD LENGTH=1341	-1.85381	0.012162	Down-regulated
At1g18880.1	Major facilitator superfamily protein | chr1:6520800-6523241 FORWARD LENGTH=1764	-1.8562	0.0119244	Down-regulated
At1g72540.1	Protein kinase superfamily protein | chr1:27314932-27316669 REVERSE LENGTH=1353	-1.86797	0.0129155	Down-regulated
At1g08340.1	Rho GTPase activating protein with PAK-box/P21-Rho-binding domain | chr1:2631308-2632669 FORWARD LENGTH=996	-1.87594	0.0111801	Down-regulated
At5g05340.1	Peroxidase superfamily protein | chr5:1579142-1580819 REVERSE LENGTH=975	-1.89024	0.010936	Down-regulated
At2g04038.1	AtbZIP48, bZIP48 | basic leucine-zipper 48 | chr2:1331919-1332419 FORWARD LENGTH=501	-1.89482	0.0136	Down-regulated
At1g15520.1	PDR12, ATPDR12, ABCG40, ATABCG40 | pleiotropic drug resistance 12 | chr1:5331993-5338175 REVERSE LENGTH=4272	-1.89606	0.010385	Down-regulated
At2g15620.1	NIR1, NIR, ATHNIR | nitrite reductase 1 | chr2:6810552-6812666 FORWARD LENGTH=1761	-1.89898	0.0115104	Down-regulated
At2g33385.1	arpc2b | actin-related protein C2B | chr2:14147604-14149769 REVERSE LENGTH=1098	-1.90539	0.0113033	Down-regulated
At3g23090.1	TPX2 (targeting protein for Xklp2) protein family | chr3:8214533-8216983 REVERSE LENGTH=1017	-1.90637	0.0111697	Down-regulated
At3g08490.1	BEST Arabidopsis thaliana protein match is: Late embryogenesis abundant protein, group 2 (TAIR:AT3G24600.1); Has 161 Blast hits to 158 proteins in 15 species: Archae - 0; Bacteria - 0; Metazoa - 0; Fungi - 0; Plants - 161; Viruses - 0; Other Eukaryotes - 0 (source: NCBI BLink). | chr3:2574105-2575125 REVERSE LENGTH=816	-1.90867	0.0103766	Down-regulated
At3g19450.1	CAD4, ATCAD4, CAD, CAD-C | GroES-like zinc-binding alcohol dehydrogenase family protein | chr3:6744859-6747005 FORWARD LENGTH=1098	-1.91916	0.0103918	Down-regulated
At4g01985.1	unknown protein; FUNCTIONS IN: molecular_function unknown; INVOLVED IN: biological_process unknown; LOCATED IN: endomembrane system; Has 35333 Blast hits to 34131 proteins in 2444 species: Archae - 798; Bacteria - 22429; Metazoa - 974; Fungi - 991; Plants - 531; Viruses - 0; Other Eukaryotes - 9610 (source: NCBI BLink). | chr4:866387-868126 REVERSE LENGTH=1740	-1.9206	0.0103176	Down-regulated
At3g29764.1	pseudogene pseudogene, DNA-directed RNA polymerase Beta chain (fragment), blastp match of 55% identity and 1.5e-06 P-value to GP|6006460|emb|CAB56784.1||AJ012560 RNA polymerase {Ginkgo biloba}	-1.92238	0.0161	Down-regulated
At2g27500.1	Glycosyl hydrolase superfamily protein | chr2:11752364-11753844 REVERSE LENGTH=1179	-1.92991	0.00994	Down-regulated
At5g34940.1	AtGUS3, GUS3 | glucuronidase 3 | chr5:13235912-13237799 REVERSE LENGTH=1206	-1.93646	0.010044	Down-regulated
At1g21890.1	nodulin MtN21 /EamA-like transporter family protein | chr1:7682808-7685581 REVERSE LENGTH=1170	-1.93649	0.0105503	Down-regulated
At4g18540.1	unknown protein; Has 209 Blast hits to 205 proteins in 54 species: Archae - 0; Bacteria - 17; Metazoa - 2; Fungi - 150; Plants - 40; Viruses - 0; Other Eukaryotes - 0 (source: NCBI BLink). | chr4:10221203-10223028 REVERSE LENGTH=1563	-1.9376	0.0099	Down-regulated
At1g29200.1	O-fucosyltransferase family protein | chr1:10208425-10210488 FORWARD LENGTH=1488	-1.93889	0.0101063	Down-regulated
At1g73140.1	TBL31 | Plant protein of unknown function (DUF828) | chr1:27502133-27503743 REVERSE LENGTH=1242	-1.94013	0.0100043	Down-regulated
At5g11570.1	Major facilitator superfamily protein | chr5:3715943-3718276 REVERSE LENGTH=1446	-1.94708	0.00973971	Down-regulated
At1g66460.1	Protein kinase superfamily protein | chr1:24789894-24791988 REVERSE LENGTH=1404	-1.94807	0.00952093	Down-regulated
At1g72230.1	Cupredoxin superfamily protein | chr1:27188287-27189093 FORWARD LENGTH=546	-1.94912	0.00981791	Down-regulated
At3g21240.1	4CL2, AT4CL2 | 4-coumarate:CoA ligase 2 | chr3:7454497-7457314 REVERSE LENGTH=1671	-1.94938	0.0103069	Down-regulated
AtCg00350.1	PSAA | Photosystem I, PsaA/PsaB protein | chrC:39605-41857 REVERSE LENGTH=2253	-1.95402	0.00985414	Down-regulated
At4g02320.1	Plant invertase/pectin methylesterase inhibitor superfamily | chr4:1022725-1026118 REVERSE LENGTH=1557	-1.95725	0.00976794	Down-regulated
At1g76110.1	HMG (high mobility group) box protein with ARID/BRIGHT DNA-binding domain | chr1:28555287-28557465 REVERSE LENGTH=1017	-1.96656	0.00941417	Down-regulated
AtCg01090.1	NDHI | NADPH dehydrogenases | chrC:119244-119762 REVERSE LENGTH=519	-1.96736	0.0099482	Down-regulated
At1g22480.1	Cupredoxin superfamily protein | chr1:7934232-7935054 REVERSE LENGTH=525	-1.97202	0.00976308	Down-regulated
At1g79180.1	ATMYB63, MYB63 | myb domain protein 63 | chr1:29786509-29787589 FORWARD LENGTH=885	-1.98452	0.00952188	Down-regulated
At2g45290.1	Transketolase | chr2:18672737-18675589 FORWARD LENGTH=2226	-1.98991	0.00913016	Down-regulated
At4g35770.1	SEN1, ATSEN1, DIN1 | Rhodanese/Cell cycle control phosphatase superfamily protein | chr4:16945073-16945983 FORWARD LENGTH=549	-1.99392	0.00894032	Down-regulated
AtCg00530.1	YCF10 | CemA-like proton extrusion protein-related | chrC:60741-61430 FORWARD LENGTH=690	-1.99901	0.0101521	Down-regulated
AtCg00080.1	PSBI | photosystem II reaction center protein I | chrC:7583-7693 FORWARD LENGTH=111	-2.00085	0.00986861	Down-regulated
At3g53400.1	BEST Arabidopsis thaliana protein match is: conserved peptide upstream open reading frame 47 (TAIR:AT5G03190.1); Has 285 Blast hits to 285 proteins in 23 species: Archae - 0; Bacteria - 0; Metazoa - 1; Fungi - 0; Plants - 279; Viruses - 0; Other Eukaryotes - 5 (source: NCBI BLink). | chr3:19798526-19799926 FORWARD LENGTH=1401	-2.00534	0.0091968	Down-regulated
At2g02950.1	PKS1 | phytochrome kinase substrate 1 | chr2:855149-856468 REVERSE LENGTH=1320	-2.00616	0.00872562	Down-regulated
At4g34230.1	CAD5, ATCAD5, CAD-5 | cinnamyl alcohol dehydrogenase 5 | chr4:16386898-16388666 REVERSE LENGTH=1074	-2.0114	0.0087623	Down-regulated
AtCg01110.1	NDHH | NAD(P)H dehydrogenase subunit H | chrC:122011-123192 REVERSE LENGTH=1182	-2.01791	0.0179321	Down-regulated
AtCg01080.1	NDHG | NADH:ubiquinone/plastoquinone oxidoreductase, chain 6 | chrC:118377-118907 REVERSE LENGTH=531	-2.02367	0.00883415	Down-regulated
At1g19170.1	Pectin lyase-like superfamily protein | chr1:6616777-6618875 FORWARD LENGTH=1521	-2.02883	0.00829	Down-regulated
At4g01680.1	MYB55, AtMYB55 | myb domain protein 55 | chr4:716222-717415 REVERSE LENGTH=1011	-2.03868	0.00791092	Down-regulated
At5g24380.1	YSL2, ATYSL2 | YELLOW STRIPE like 2 | chr5:8324098-8326525 FORWARD LENGTH=1995	-2.05912	0.00975852	Down-regulated
At1g51090.1	Heavy metal transport/detoxification superfamily protein | chr1:18932985-18933747 FORWARD LENGTH=516	-2.05954	0.0074614	Down-regulated
At1g51680.1	4CL1, 4CL.1, AT4CL1 | 4-coumarate:CoA ligase 1 | chr1:19159007-19161464 REVERSE LENGTH=1686	-2.06527	0.00767797	Down-regulated
At1g56430.1	ATNAS4, NAS4 | nicotianamine synthase 4 | chr1:21137023-21137997 FORWARD LENGTH=975	-2.07338	0.00745664	Down-regulated
At1g27380.2	RIC2 | ROP-interactive CRIB motif-containing protein 2 | chr1:9508903-9509827 REVERSE LENGTH=336	-2.07379	0.00754483	Down-regulated
At5g42710.1	unknown protein; Has 1807 Blast hits to 1807 proteins in 277 species: Archae - 0; Bacteria - 0; Metazoa - 736; Fungi - 347; Plants - 385; Viruses - 0; Other Eukaryotes - 339 (source: NCBI BLink). | chr5:17125578-17128696 FORWARD LENGTH=2424	-2.0811	0.00752137	Down-regulated
At2g37870.1	Bifunctional inhibitor/lipid-transfer protein/seed storage 2S albumin superfamily protein | chr2:15859280-15859723 FORWARD LENGTH=348	-2.08898	0.00745217	Down-regulated
At2g37090.1	IRX9 | Nucleotide-diphospho-sugar transferases superfamily protein | chr2:15587671-15589223 REVERSE LENGTH=1056	-2.09733	0.00709455	Down-regulated
At1g09440.1	Protein kinase superfamily protein | chr1:3045513-3047393 REVERSE LENGTH=1401	-2.10122	0.00739107	Down-regulated
At3g62960.1	Thioredoxin superfamily protein | chr3:23268780-23269088 FORWARD LENGTH=309	-2.10751	0.00693394	Down-regulated
AtCg00700.1	PSBN | photosystem II reaction center protein N | chrC:74249-74380 REVERSE LENGTH=132	-2.11162	0.00706667	Down-regulated
At4g32000.1	Protein kinase superfamily protein | chr4:15474083-15476655 REVERSE LENGTH=1257	-2.12158	0.00668333	Down-regulated
At4g34610.1	BLH6 | BEL1-like homeodomain 6 | chr4:16530546-16532498 REVERSE LENGTH=1599	-2.12389	0.00666542	Down-regulated
At1g74360.1	Leucine-rich repeat protein kinase family protein | chr1:27954299-27957911 FORWARD LENGTH=3321	-2.13537	0.00656038	Down-regulated
At4g27435.1	Protein of unknown function (DUF1218) | chr4:13723903-13724872 FORWARD LENGTH=522	-2.15018	0.00650095	Down-regulated
At3g57230.1	AGL16 | AGAMOUS-like 16 | chr3:21177710-21180671 FORWARD LENGTH=723	-2.15148	0.00606337	Down-regulated
At5g48560.1	basic helix-loop-helix (bHLH) DNA-binding superfamily protein | chr5:19684160-19686871 FORWARD LENGTH=1497	-2.15767	0.00601569	Down-regulated
At3g50220.1	Protein of unknown function (DUF579) | chr3:18617672-18618640 REVERSE LENGTH=969	-2.16002	0.00624038	Down-regulated
At1g17010.1	2-oxoglutarate (2OG) and Fe(II)-dependent oxygenase superfamily protein | chr1:5817667-5819183 FORWARD LENGTH=1086	-2.1647	0.0060466	Down-regulated
At4g36890.1	IRX14 | Nucleotide-diphospho-sugar transferases superfamily protein | chr4:17379631-17381627 REVERSE LENGTH=1578	-2.16473	0.00610707	Down-regulated
At3g25640.1	Protein of unknown function, DUF617 | chr3:9333775-9334578 FORWARD LENGTH=804	-2.16486	0.006084	Down-regulated
At1g56720.1	Protein kinase superfamily protein | chr1:21263630-21265559 REVERSE LENGTH=1479	-2.16866	0.00614845	Down-regulated
At2g38230.1	ATPDX1.1, PDX1.1 | pyridoxine biosynthesis 1.1 | chr2:16011475-16012404 FORWARD LENGTH=930	-2.17037	0.00613548	Down-regulated
At2g40120.1	Protein kinase superfamily protein | chr2:16755137-16757258 REVERSE LENGTH=1713	-2.17483	0.00622128	Down-regulated
At1g07120.1	FUNCTIONS IN: molecular_function unknown; INVOLVED IN: biological_process unknown; LOCATED IN: chloroplast envelope; EXPRESSED IN: inflorescence meristem, petal, leaf whorl, flower; EXPRESSED DURING: 4 anthesis, petal differentiation and expansion stage; BEST Arabidopsis thaliana protein match is: Tetratricopeptide repeat (TPR)-like superfamily protein (TAIR:AT4G18570.1); Has 288 Blast hits to 26…	-2.17552	0.00611429	Down-regulated
At4g03175.1	Protein kinase superfamily protein | chr4:1402187-1402864 REVERSE LENGTH=420	-2.17792	0.00624842	Down-regulated
At2g31900.1	XIF, ATXIF, ATMYO5 | myosin-like protein XIF | chr2:13560760-13569623 REVERSE LENGTH=4671	-2.17839	0.0061413	Down-regulated
At5g60720.1	Protein of unknown function, DUF547 | chr5:24418436-24422177 REVERSE LENGTH=2076	-2.19369	0.00621042	Down-regulated
At1g57590.1	Pectinacetylesterase family protein | chr1:21327458-21329707 REVERSE LENGTH=1335	-2.19706	0.00613626	Down-regulated
At4g35060.1	HIPP25 | Heavy metal transport/detoxification superfamily protein | chr4:16685874-16686419 REVERSE LENGTH=462	-2.21912	0.00551011	Down-regulated
At2g35870.1	NA	-2.2234	0.00555556	Down-regulated
At5g47530.1	Auxin-responsive family protein | chr5:19281471-19282870 FORWARD LENGTH=1188	-2.25176	0.00531163	Down-regulated
At1g77330.1	2-oxoglutarate (2OG) and Fe(II)-dependent oxygenase superfamily protein | chr1:29063215-29064447 REVERSE LENGTH=924	-2.27146	0.00511529	Down-regulated
At5g16570.1	GLN1;4 | glutamine synthetase 1;4 | chr5:5421898-5424523 REVERSE LENGTH=1071	-2.27218	0.00547356	Down-regulated
At1g02640.1	BXL2, ATBXL2 | beta-xylosidase 2 | chr1:564293-567580 FORWARD LENGTH=2307	-2.28574	0.00465952	Down-regulated
At5g10770.1	Eukaryotic aspartyl protease family protein | chr5:3403331-3405331 REVERSE LENGTH=1425	-2.30403	0.00557273	Down-regulated
At3g45600.1	TET3 | tetraspanin3 | chr3:16733973-16735854 REVERSE LENGTH=858	-2.30601	0.00440964	Down-regulated
At4g26530.1	Aldolase superfamily protein | chr4:13391566-13392937 FORWARD LENGTH=1077	-2.30926	0.00424444	Down-regulated
At1g19300.1	GATL1, PARVUS, GLZ1, ATGATL1 | Nucleotide-diphospho-sugar transferases superfamily protein | chr1:6671451-6672506 REVERSE LENGTH=1056	-2.31254	0.0042775	Down-regulated
At5g14090.1	unknown protein; Has 56 Blast hits to 56 proteins in 18 species: Archae - 0; Bacteria - 0; Metazoa - 0; Fungi - 2; Plants - 46; Viruses - 0; Other Eukaryotes - 8 (source: NCBI BLink). | chr5:4547230-4549214 FORWARD LENGTH=1077	-2.33824	0.00426329	Down-regulated
At4g26580.1	RING/U-box superfamily protein | chr4:13411705-13412889 REVERSE LENGTH=1008	-2.33853	0.00428293	Down-regulated
At5g58770.1	Undecaprenyl pyrophosphate synthetase family protein | chr5:23734396-23735495 FORWARD LENGTH=933	-2.34819	0.00398974	Down-regulated
At5g45380.1	ATDUR3, DUR3 | solute:sodium symporters;urea transmembrane transporters | chr5:18391337-18395696 FORWARD LENGTH=2115	-2.36077	0.00405	Down-regulated
At4g33330.1	PGSIP3, GUX2 | plant glycogenin-like starch initiation protein 3 | chr4:16060142-16063061 REVERSE LENGTH=1791	-2.37118	0.00384267	Down-regulated
At3g27960.1	Tetratricopeptide repeat (TPR)-like superfamily protein | chr3:10380513-10382593 REVERSE LENGTH=1992	-2.3878	0.0040026	Down-regulated
At2g45220.1	Plant invertase/pectin methylesterase inhibitor superfamily | chr2:18644281-18646394 REVERSE LENGTH=1536	-2.39594	0.00366216	Down-regulated
At1g73640.1	AtRABA6a, RABA6a | RAB GTPase homolog A6A | chr1:27687033-27687987 FORWARD LENGTH=702	-2.40131	0.00365205	Down-regulated
At3g05400.1	Major facilitator superfamily protein | chr3:1549702-1553942 FORWARD LENGTH=1389	-2.40867	0.00351389	Down-regulated
At3g59010.1	PME61 | pectin methylesterase 61 | chr3:21803015-21805098 REVERSE LENGTH=1590	-2.41824	0.00354366	Down-regulated
At5g01190.1	LAC10 | laccase 10 | chr5:72392-74612 FORWARD LENGTH=1677	-2.43179	0.00357143	Down-regulated
At1g63910.1	AtMYB103, MYB103 | myb domain protein 103 | chr1:23719968-23721625 REVERSE LENGTH=1113	-2.44638	0.00348235	Down-regulated
At5g53370.1	ATPMEPCRF, PMEPCRF | pectin methylesterase PCR fragment F | chr5:21649683-21651530 REVERSE LENGTH=1764	-2.4479	0.00346957	Down-regulated
At4g22690.1	CYP706A1 | cytochrome P450, family 706, subfamily A, polypeptide 1 | chr4:11929847-11931520 FORWARD LENGTH=1674	-2.47004	0.00329552	Down-regulated
At1g27440.1	GUT2, IRX10, ATGUT1 | Exostosin family protein | chr1:9529265-9531213 REVERSE LENGTH=1239	-2.47633	0.00333939	Down-regulated
At5g43150.1	unknown protein; FUNCTIONS IN: molecular_function unknown; INVOLVED IN: biological_process unknown; LOCATED IN: mitochondrion; EXPRESSED IN: 22 plant structures; EXPRESSED DURING: 13 growth stages; Has 1807 Blast hits to 1807 proteins in 277 species: Archae - 0; Bacteria - 0; Metazoa - 736; Fungi - 347; Plants - 385; Viruses - 0; Other Eukaryotes - 339 (source: NCBI BLink). | chr5:17325076-173256…	-2.47865	0.00336923	Down-regulated
At4g26520.1	Aldolase superfamily protein | chr4:13388676-13390191 FORWARD LENGTH=1077	-2.47886	0.00339672	Down-regulated
At4g10120.1	ATSPS4F | Sucrose-phosphate synthase family protein | chr4:6315033-6319785 FORWARD LENGTH=3153	-2.48435	0.00339661	Down-regulated
At4g24910.1	Protein of unknown function (DUF579) | chr4:12817954-12818901 REVERSE LENGTH=948	-2.48862	0.00335484	Down-regulated
At2g46770.1	NST1, EMB2301, ANAC043 | NAC (No Apical Meristem) domain transcriptional regulator superfamily protein | chr2:19220917-19222822 REVERSE LENGTH=1098	-2.49201	0.00337813	Down-regulated
At4g12470.1	AZI1 | azelaic acid induced 1 | chr4:7401371-7401856 REVERSE LENGTH=486	-2.49781	0.00335	Down-regulated
At1g02500.1	SAM1, SAM-1, MAT1, AtSAM1 | S-adenosylmethionine synthetase 1 | chr1:519037-520218 FORWARD LENGTH=1182	-2.50159	0.00341587	Down-regulated
At1g27920.1	MAP65-8 | microtubule-associated protein 65-8 | chr1:9727106-9729848 FORWARD LENGTH=1689	-2.50967	0.00312759	Down-regulated
At2g41610.1	unknown protein; Has 35333 Blast hits to 34131 proteins in 2444 species: Archae - 798; Bacteria - 22429; Metazoa - 974; Fungi - 991; Plants - 531; Viruses - 0; Other Eukaryotes - 9610 (source: NCBI BLink). | chr2:17347181-17348113 FORWARD LENGTH=933	-2.51949	0.00314737	Down-regulated
At2g43050.1	ATPMEPCRD | Plant invertase/pectin methylesterase inhibitor superfamily | chr2:17902508-17904174 FORWARD LENGTH=1557	-2.5371	0.00308571	Down-regulated
At3g09450.1	CONTAINS InterPro DOMAIN/s: Fusaric acid resistance protein, conserved region (InterPro:IPR006726); BEST Arabidopsis thaliana protein match is: unknown protein (TAIR:AT2G28780.1); Has 503 Blast hits to 494 proteins in 215 species: Archae - 0; Bacteria - 423; Metazoa - 0; Fungi - 0; Plants - 65; Viruses - 0; Other Eukaryotes - 15 (source: NCBI BLink). | chr3:2907548-2910091 FORWARD LENGTH=2328	-2.57047	0.00275273	Down-regulated
At4g23990.1	ATCSLG3, CSLG3 | cellulose synthase like G3 | chr4:12456491-12460498 FORWARD LENGTH=2256	-2.58117	0.00267407	Down-regulated
At1g74660.1	MIF1 | mini zinc finger 1 | chr1:28047742-28048050 REVERSE LENGTH=309	-2.62319	0.00242692	Down-regulated
At1g54790.1	GDSL-like Lipase/Acylhydrolase superfamily protein | chr1:20441124-20443997 REVERSE LENGTH=1149	-2.65034	0.00238824	Down-regulated
At5g44030.1	CESA4, IRX5, NWS2 | cellulose synthase A4 | chr5:17714713-17719564 FORWARD LENGTH=3150	-2.65909	0.00243396	Down-regulated
At1g58370.1	RXF12, ATXYN1 | glycosyl hydrolase family 10 protein / carbohydrate-binding domain-containing protein | chr1:21684751-21688209 FORWARD LENGTH=2754	-2.71639	0.001868	Down-regulated
AtCg01100.1	NDHA | NADH dehydrogenase family protein | chrC:119847-122009 REVERSE LENGTH=1083	-2.72205	0.00182553	Down-regulated
At5g54585.1	unknown protein; Has 30201 Blast hits to 17322 proteins in 780 species: Archae - 12; Bacteria - 1396; Metazoa - 17338; Fungi - 3422; Plants - 5037; Viruses - 0; Other Eukaryotes - 2996 (source: NCBI BLink). | chr5:22175688-22176509 FORWARD LENGTH=399	-2.74439	0.00180417	Down-regulated
At3g08860.1	PYD4 | PYRIMIDINE 4 | chr3:2696754-2699087 REVERSE LENGTH=1446	-2.7473	0.00187755	Down-regulated
At3g55990.1	ESK1, TBL29 | Plant protein of unknown function (DUF828) | chr3:20780410-20782931 FORWARD LENGTH=1464	-2.78484	0.00179091	Down-regulated
At5g15900.1	TBL19 | TRICHOME BIREFRINGENCE-LIKE 19 | chr5:5189524-5192070 REVERSE LENGTH=1281	-2.78571	0.00178222	Down-regulated
At2g31930.1	unknown protein; Has 35333 Blast hits to 34131 proteins in 2444 species: Archae - 798; Bacteria - 22429; Metazoa - 974; Fungi - 991; Plants - 531; Viruses - 0; Other Eukaryotes - 9610 (source: NCBI BLink). | chr2:13577566-13577997 FORWARD LENGTH=432	-2.79031	0.00175652	Down-regulated
At3g56060.1	Glucose-methanol-choline (GMC) oxidoreductase family protein | chr3:20803328-20805983 REVERSE LENGTH=1734	-2.80506	0.00157619	Down-regulated
At2g28110.1	FRA8, IRX7 | Exostosin family protein | chr2:11978024-11979641 REVERSE LENGTH=1347	-2.81852	0.00164651	Down-regulated
At4g08160.1	glycosyl hydrolase family 10 protein / carbohydrate-binding domain-containing protein | chr4:5159211-5162694 REVERSE LENGTH=2259	-2.85072	0.00145366	Down-regulated
At3g45870.1	nodulin MtN21 /EamA-like transporter family protein | chr3:16867246-16868838 FORWARD LENGTH=1158	-2.86233	0.00149	Down-regulated
At5g03170.1	FLA11, ATFLA11 | FASCICLIN-like arabinogalactan-protein 11 | chr5:752898-753638 REVERSE LENGTH=741	-2.89173	0.00133684	Down-regulated
At1g30900.1	VSR6, VSR3;3, BP80-3;3 | VACUOLAR SORTING RECEPTOR 6 | chr1:10997275-11000543 FORWARD LENGTH=1896	-2.92871	0.00132821	Down-regulated
At4g22680.1	MYB85, AtMYB85 | myb domain protein 85 | chr4:11922789-11924080 REVERSE LENGTH=801	-2.94046	0.00120541	Down-regulated
At2g38080.1	IRX12, LAC4, ATLMCO4, LMCO4 | Laccase/Diphenol oxidase family protein | chr2:15934540-15937352 FORWARD LENGTH=1677	-2.94097	0.00124118	Down-regulated
At5g60490.1	FLA12 | FASCICLIN-like arabinogalactan-protein 12 | chr5:24325916-24326665 REVERSE LENGTH=750	-2.96402	0.00118333	Down-regulated
At2g40370.1	LAC5 | laccase 5 | chr2:16858192-16860593 REVERSE LENGTH=1743	-2.97179	0.00128125	Down-regulated
At2g29130.1	LAC2, ATLAC2 | laccase 2 | chr2:12525189-12527699 REVERSE LENGTH=1722	-2.97636	0.00126061	Down-regulated
At2g40320.1	TBL33 | TRICHOME BIREFRINGENCE-LIKE 33 | chr2:16840330-16842139 FORWARD LENGTH=1278	-2.97705	0.00121143	Down-regulated
At1g24030.1	Protein kinase superfamily protein | chr1:8503394-8505195 FORWARD LENGTH=1128	-3.03973	0.00106207	Down-regulated
At1g32100.1	ATPRR1, PRR1 | pinoresinol reductase 1 | chr1:11546472-11547953 REVERSE LENGTH=954	-3.04109	0.00113548	Down-regulated
At1g64400.1	LACS3 | AMP-dependent synthetase and ligase family protein | chr1:23915802-23919681 REVERSE LENGTH=1998	-3.05649	0.00105333	Down-regulated
At5g17420.1	IRX3, CESA7, ATCESA7, MUR10 | Cellulose synthase family protein | chr5:5736859-5741407 REVERSE LENGTH=3081	-3.0788	0.00105	Down-regulated
At1g33800.1	Protein of unknown function (DUF579) | chr1:12261480-12262456 FORWARD LENGTH=894	-3.08012	0.00103704	Down-regulated
At1g32940.1	ATSBT3.5, SBT3.5 | Subtilase family protein | chr1:11937634-11940856 FORWARD LENGTH=2325	-3.1259	0.000952	Down-regulated
At3g63280.1	ATNEK4, NEK4 | NIMA-related kinase 4 | chr3:23378582-23381362 FORWARD LENGTH=1668	-3.13009	0.00101538	Down-regulated
At3g18660.1	PGSIP1, GUX1 | plant glycogenin-like starch initiation protein 1 | chr3:6419211-6421959 REVERSE LENGTH=1968	-3.26502	0.000475	Down-regulated
At5g06930.1	LOCATED IN: chloroplast; EXPRESSED IN: 15 plant structures; EXPRESSED DURING: 7 growth stages; BEST Arabidopsis thaliana protein match is: nucleolar protein gar2-related (TAIR:AT2G42320.2); Has 3369 Blast hits to 1526 proteins in 313 species: Archae - 2; Bacteria - 910; Metazoa - 754; Fungi - 336; Plants - 137; Viruses - 11; Other Eukaryotes - 1219 (source: NCBI BLink). | chr5:2145139-2147849 FOR…	-3.32624	0.000409091	Down-regulated
At3g21710.1	unknown protein; Has 42 Blast hits to 42 proteins in 10 species: Archae - 0; Bacteria - 0; Metazoa - 0; Fungi - 0; Plants - 42; Viruses - 0; Other Eukaryotes - 0 (source: NCBI BLink). | chr3:7648380-7649138 FORWARD LENGTH=528	-3.32891	0.000469565	Down-regulated
At5g15630.1	COBL4, IRX6 | COBRA-like extracellular glycosyl-phosphatidyl inositol-anchored protein family | chr5:5084842-5086545 FORWARD LENGTH=1296	-3.35479	0.000409524	Down-regulated
At1g68200.1	Zinc finger C-x8-C-x5-C-x3-H type family protein | chr1:25562118-25563948 FORWARD LENGTH=927	-3.395	0.000389474	Down-regulated
At1g09610.1	Protein of unknown function (DUF579) | chr1:3111789-3112637 FORWARD LENGTH=849	-3.396	0.000333333	Down-regulated
At5g61340.1	unknown protein; BEST Arabidopsis thaliana protein match is: unknown protein (TAIR:AT1G26650.1); Has 30201 Blast hits to 17322 proteins in 780 species: Archae - 12; Bacteria - 1396; Metazoa - 17338; Fungi - 3422; Plants - 5037; Viruses - 0; Other Eukaryotes - 2996 (source: NCBI BLink). | chr5:24662064-24663044 REVERSE LENGTH=981	-3.39708	0.00037	Down-regulated
At5g01360.1	TBL3 | Plant protein of unknown function (DUF828) | chr5:147608-149316 REVERSE LENGTH=1305	-3.50919	0.000282353	Down-regulated
At1g32770.1	ANAC012, SND1, NST3, NAC012 | NAC domain containing protein 12 | chr1:11865343-11866950 REVERSE LENGTH=1077	-3.6264	0.000266667	Down-regulated
At5g54690.1	GAUT12, LGT6, IRX8 | galacturonosyltransferase 12 | chr5:22219435-22221769 REVERSE LENGTH=1608	-3.62932	0.00025	Down-regulated
At4g28380.1	Leucine-rich repeat (LRR) family protein | chr4:14039756-14040931 REVERSE LENGTH=1176	-3.64991	0.000230769	Down-regulated
At2g37280.1	PDR5, ATPDR5 | pleiotropic drug resistance 5 | chr2:15650400-15656417 FORWARD LENGTH=4242	-3.66207	0.000257143	Down-regulated
At1g80170.1	Pectin lyase-like superfamily protein | chr1:30153646-30155683 REVERSE LENGTH=1335	-3.71721	0.0002	Down-regulated
At5g42180.1	Peroxidase superfamily protein | chr5:16852702-16854021 FORWARD LENGTH=954	-3.72592	0.000127273	Down-regulated
At4g28370.1	RING/U-box superfamily protein | chr4:14035016-14039122 FORWARD LENGTH=1689	-3.73785	0.00012	Down-regulated
At1g79620.1	Leucine-rich repeat protein kinase family protein | chr1:29957633-29962174 REVERSE LENGTH=2916	-3.81462	0.00015	Down-regulated
At5g05390.1	LAC12 | laccase 12 | chr5:1594753-1597042 FORWARD LENGTH=1698	-3.81602	0.000133333	Down-regulated
At3g16920.1	CTL2, ATCTL2 | chitinase-like protein 2 | chr3:5776663-5777886 REVERSE LENGTH=1047	-3.88775	2.85714e-05	Down-regulated
At3g15050.1	IQD10 | IQ-domain 10 | chr3:5066879-5067892 REVERSE LENGTH=780	-4.12713	0	Down-regulated
At3g16660.1	Pollen Ole e 1 allergen and extensin family protein | chr3:5676904-5677788 FORWARD LENGTH=543	-4.31186	0	Down-regulated
At5g37478.1	TPX2 (targeting protein for Xklp2) protein family | chr5:14881560-14883799 FORWARD LENGTH=537	-4.34664	0	Down-regulated
At4g18780.1	CESA8, IRX1, ATCESA8, LEW2 | cellulose synthase family protein | chr4:10312846-10316719 REVERSE LENGTH=2958	-4.40615	0	Down-regulated
At4g12480.1	pEARLI 1 | Bifunctional inhibitor/lipid-transfer protein/seed storage 2S albumin superfamily protein | chr4:7406371-7406877 REVERSE LENGTH=507	-4.43177	0	Down-regulated
At1g13635.1	DNA glycosylase superfamily protein | chr1:4674248-4675784 FORWARD LENGTH=936	-5.69014	0	Down-regulated
F': Boechera stricta uninfected flowers. 'SL': Boechera stricta uninfected stems and leaves. *False Discovery Rate (FDR) estimated using Rank Products (RP) to detect genes that are differentially expressed. Genes with RP FDR < 0.05 are considered significant.
