# Supplementary material for: Major Transcriptome Reprogramming Underlies Floral Mimicry Induced by the Rust Fungus Puccinia monoica in Boechera stricta
Source: PLoS One. 2013 Sep 17;8(9):e75293. doi: 10.1371/journal.pone.0075293 (PMC3775748; doi:10.1371/journal.pone.0075293)
Supplement: Table S4 — List of 199 gene ontology biological processes (GOBP) enriched in uninfected Boechera stricta flowers. 'F': Boechera stricta uninfected flowers. 'SL': Boechera stricta uninfected stems and leaves. aNumber of genes within found within the biological process. bP-value showing the significance for enrichment of genes within the biological process. (XLSX) [file pone.0075293.s004.xlsx]

## Sheet: Table S4
Gene Ontology Biological Process category (GOBP) ID	GOBP Description	No. of genesa	GOBP enrichment p-valueb in 'F' vs. 'SL'	GOBP node size (-Log10 of enrichment p-value) in 'F' vs. 'SL'	GOBP average gene expression (Log2) in 'F' vs. 'SL'
71554	cell wall organization or biogenesis	42	4.7247e-14	13.3256	-0.341408
42546	cell wall biogenesis	20	8.2835e-10	9.08179	-2.04907
32502	developmental process	118	2.5069e-09	8.60086	1.24399
70882	cellular cell wall organization or biogenesis	20	2.8712e-09	8.54194	-2.04907
9834	secondary cell wall biogenesis	11	4.1162e-09	8.3855	-2.85185
32501	multicellular organismal process	111	1.1963e-08	7.92216	1.23145
9832	plant-type cell wall biogenesis	16	1.7726e-08	7.75139	-1.95304
9555	pollen development	24	3.6505e-08	7.43765	2.2591
71555	cell wall organization	25	5.2575e-08	7.27922	0.748461
7275	multicellular organismal development	104	9.484e-08	7.02301	1.29051
42545	cell wall modification	21	2.4835e-07	6.60494	1.13825
3	reproduction	68	2.8296e-07	6.54827	1.85668
71669	plant-type cell wall organization or biogenesis	21	3.2384e-07	6.48967	-1.27382
48229	gametophyte development	27	3.4893e-07	6.45726	2.22495
9908	flower development	28	3.8336e-07	6.41639	2.62729
10927	cellular component assembly involved in morphogenesis	9	4.9588e-07	6.30462	3.09092
10208	pollen wall assembly	9	4.9588e-07	6.30462	3.09092
45229	external encapsulating structure organization	10	9.8933e-07	6.00466	2.41889
48437	floral organ development	21	1.053e-06	5.97757	2.6454
10584	pollen exine formation	8	1.053e-06	5.97757	3.17104
48438	floral whorl development	19	1.8021e-06	5.74422	2.73397
44281	small molecule metabolic process	79	4.2992e-06	5.36661	0.0526061
6575	cellular amino acid derivative metabolic process	26	5.2674e-06	5.2784	-0.884836
9698	phenylpropanoid metabolic process	19	6.5092e-06	5.18647	-1.35074
10382	cellular cell wall macromolecule metabolic process	7	6.6982e-06	5.17404	-2.65394
5975	carbohydrate metabolic process	56	6.6982e-06	5.17404	0.0372454
19953	sexual reproduction	13	7.2145e-06	5.14179	2.41624
271	polysaccharide biosynthetic process	16	8.4006e-06	5.07569	-1.98583
10417	glucuronoxylan biosynthetic process	6	1.0662e-05	4.97216	-2.58313
10413	glucuronoxylan metabolic process	6	1.0662e-05	4.97216	-2.58313
45492	xylan biosynthetic process	6	1.0662e-05	4.97216	-2.58313
10022	meristem determinacy	6	1.0662e-05	4.97216	4.03786
10073	meristem maintenance	12	1.1413e-05	4.9426	2.60305
6725	cellular aromatic compound metabolic process	29	1.3345e-05	4.87468	-0.581728
22414	reproductive process	61	1.4011e-05	4.85353	1.85942
33692	cellular polysaccharide biosynthetic process	15	1.5961e-05	4.79694	-2.24929
10582	floral meristem determinacy	5	2.8929e-05	4.53867	4.03786
3006	reproductive developmental process	56	2.9743e-05	4.52662	1.92887
70589	cellular component macromolecule biosynthetic process	6	3.3708e-05	4.47227	-2.58313
70592	cell wall polysaccharide biosynthetic process	6	3.3708e-05	4.47227	-2.58313
44038	cell wall macromolecule biosynthetic process	6	3.3708e-05	4.47227	-2.58313
9638	phototropism	6	3.3708e-05	4.47227	-2.00616
48856	anatomical structure development	81	4.5591e-05	4.34112	1.64247
48569	post-embryonic organ development	22	4.5591e-05	4.34112	2.39815
9808	lignin metabolic process	10	4.566e-05	4.34046	-2.48796
10383	cell wall polysaccharide metabolic process	7	4.7269e-05	4.32542	-2.65394
10410	hemicellulose metabolic process	6	5.3193e-05	4.27415	-2.58313
45491	xylan metabolic process	6	5.3193e-05	4.27415	-2.58313
48440	carpel development	11	7.169e-05	4.14454	2.91295
19748	secondary metabolic process	29	8.2753e-05	4.08222	-0.574437
48507	meristem development	14	9.3521e-05	4.02909	2.07349
6519	cellular amino acid and derivative metabolic process	37	9.9358e-05	4.0028	-0.682264
44283	small molecule biosynthetic process	44	9.9757e-05	4.00106	0.274121
44264	cellular polysaccharide metabolic process	17	0.00010521	3.97794	-1.94227
44262	cellular carbohydrate metabolic process	34	0.00010521	3.97794	-0.54819
48481	ovule development	9	0.00013226	3.87857	2.57836
42398	cellular amino acid derivative biosynthetic process	19	0.00013226	3.87857	-0.650557
5976	polysaccharide metabolic process	18	0.00013346	3.87465	-1.72515
34637	cellular carbohydrate biosynthetic process	19	0.00015143	3.81979	-1.24689
50793	regulation of developmental process	25	0.00015703	3.80402	1.29944
65007	biological regulation	154	0.00015703	3.80402	0.583825
48467	gynoecium development	11	0.00015703	3.80402	2.91295
19438	aromatic compound biosynthetic process	19	0.00019518	3.70956	-0.21398
48646	anatomical structure formation involved in morphogenesis	14	0.00019518	3.70956	2.92547
9063	cellular amino acid catabolic process	8	0.00020896	3.67994	0.660126
9699	phenylpropanoid biosynthetic process	14	0.00021195	3.67377	-0.973535
44282	small molecule catabolic process	18	0.00021339	3.67083	-0.288768
44085	cellular component biogenesis	34	0.00029611	3.52855	-0.40693
48869	cellular developmental process	33	0.00029824	3.52543	2.15871
9310	amine catabolic process	8	0.00030967	3.5091	0.660126
6629	lipid metabolic process	40	0.00033447	3.47564	1.08113
19752	carboxylic acid metabolic process	42	0.000336	3.47366	0.383257
43436	oxoacid metabolic process	42	0.000336	3.47366	0.383257
6082	organic acid metabolic process	42	0.00034422	3.46316	0.383257
32787	monocarboxylic acid metabolic process	25	0.0003547	3.45014	0.865017
48608	reproductive structure development	47	0.00045628	3.34077	1.95456
42180	cellular ketone metabolic process	42	0.00046233	3.33505	0.383257
48513	organ development	46	0.00053337	3.27297	1.52613
16051	carbohydrate biosynthetic process	21	0.00053694	3.27007	-1.09502
48731	system development	46	0.00053789	3.26931	1.52613
10254	nectary development	3	0.00057902	3.23731	4.03786
10050	vegetative phase change	4	0.00061824	3.20884	-1.64401
10158	abaxial cell fate specification	4	0.00061824	3.20884	3.20676
30244	cellulose biosynthetic process	7	0.00075392	3.12267	-2.73063
10876	lipid localization	16	0.00098311	3.0074	1.09466
3002	regionalization	12	0.0010332	2.98582	1.20053
6631	fatty acid metabolic process	17	0.0010909	2.96222	1.14292
30243	cellulose metabolic process	7	0.0013816	2.85962	-2.73063
51239	regulation of multicellular organismal process	20	0.0016102	2.79312	1.0051
16054	organic acid catabolic process	10	0.0016254	2.78904	0.56456
46395	carboxylic acid catabolic process	10	0.0016254	2.78904	0.56456
9944	polarity specification of adaxial/abaxial axis	5	0.0018728	2.72751	2.84422
6624	vacuolar protein processing	3	0.0019659	2.70644	-1.81698
9889	regulation of biosynthetic process	79	0.0022037	2.65685	0.607192
31326	regulation of cellular biosynthetic process	79	0.0022037	2.65685	0.607192
48518	positive regulation of biological process	19	0.0022466	2.64847	-0.635667
9791	post-embryonic development	51	0.0022552	2.64681	1.60232
65001	specification of axis polarity	5	0.0024211	2.61599	2.84422
55114	oxidation reduction	14	0.0027765	2.5565	-0.952458
80090	regulation of primary metabolic process	81	0.0028458	2.5458	0.644099
9809	lignin biosynthetic process	6	0.0035839	2.44564	-2.58094
48580	regulation of post-embryonic development	15	0.0037091	2.43073	0.401781
44255	cellular lipid metabolic process	28	0.0038359	2.41613	0.685133
9943	adaxial/abaxial axis specification	5	0.0040124	2.3966	2.84422
19439	aromatic compound catabolic process	5	0.0040124	2.3966	-1.43642
10769	regulation of cell morphogenesis involved in differentiation	3	0.0040867	2.38863	2.26969
80092	regulation of pollen tube growth	3	0.0040867	2.38863	2.26969
80086	stamen filament development	3	0.0040867	2.38863	4.17361
60284	regulation of cell development	3	0.0040867	2.38863	2.26969
48443	stamen development	8	0.0042842	2.36813	2.68107
48466	androecium development	8	0.0042842	2.36813	2.68107
9653	anatomical structure morphogenesis	33	0.0044698	2.34971	2.03125
44036	cell wall macromolecule metabolic process	7	0.0044698	2.34971	-2.65394
6820	anion transport	9	0.0044978	2.347	0.580117
31323	regulation of cellular metabolic process	82	0.004831	2.31596	0.616194
7389	pattern specification process	12	0.0053065	2.27519	1.20053
45595	regulation of cell differentiation	7	0.0058334	2.23408	2.17827
10556	regulation of macromolecule biosynthetic process	75	0.0059207	2.22763	0.709758
1708	cell fate specification	5	0.0073046	2.1364	4.30976
42219	cellular amino acid derivative catabolic process	5	0.0073046	2.1364	-1.43642
45449	regulation of transcription	73	0.0073809	2.13189	0.743432
51171	regulation of nitrogen compound metabolic process	76	0.0077505	2.11067	0.741794
6869	lipid transport	13	0.0079856	2.09769	0.548338
48522	positive regulation of cellular process	13	0.0079856	2.09769	-0.345644
9909	regulation of flower development	11	0.0079875	2.09759	0.120383
9955	adaxial/abaxial pattern formation	5	0.008642	2.06339	2.84422
10565	regulation of cellular ketone metabolic process	5	0.010507	1.97852	-0.666342
6569	tryptophan catabolic process	2	0.010507	1.97852	2.27429
6548	histidine catabolic process	2	0.010507	1.97852	-1.46557
9077	histidine family amino acid catabolic process	2	0.010507	1.97852	-1.46557
46218	indolalkylamine catabolic process	2	0.010507	1.97852	2.27429
44092	negative regulation of molecular function	8	0.010507	1.97852	1.52605
48638	regulation of developmental growth	6	0.011163	1.95222	2.21173
19219	regulation of nucleobase, nucleoside, nucleotide and nucleic acid metabolic process	74	0.012355	1.90816	0.762075
9250	glucan biosynthetic process	8	0.012569	1.9007	-2.08305
51094	positive regulation of developmental process	7	0.012569	1.9007	-1.5562
9637	response to blue light	7	0.012569	1.9007	-1.62699
32989	cellular component morphogenesis	19	0.013499	1.8697	2.32836
48878	chemical homeostasis	11	0.016375	1.78582	0.787953
10047	fruit dehiscence	3	0.016475	1.78317	-1.5142
9798	axis specification	5	0.016475	1.78317	2.84422
19222	regulation of metabolic process	85	0.016475	1.78317	0.526274
6857	oligopeptide transport	8	0.017616	1.75409	-0.899671
15833	peptide transport	8	0.017616	1.75409	-0.899671
65008	regulation of biological quality	33	0.018074	1.74295	0.985291
43900	regulation of multi-organism process	4	0.018074	1.74295	2.27084
19216	regulation of lipid metabolic process	4	0.018074	1.74295	-1.47833
46700	heterocycle catabolic process	5	0.018669	1.72888	0.185999
50896	response to stimulus	137	0.021143	1.67483	-0.330466
10468	regulation of gene expression	77	0.021254	1.67256	0.640835
10252	auxin homeostasis	4	0.022019	1.6572	2.55354
8284	positive regulation of cell proliferation	3	0.022218	1.6533	0.165117
50794	regulation of cellular process	108	0.022744	1.64313	0.469993
9719	response to endogenous stimulus	44	0.022744	1.64313	0.633713
6633	fatty acid biosynthetic process	10	0.023953	1.62064	1.23189
48582	positive regulation of post-embryonic development	6	0.024354	1.61343	-1.50574
80110	sporopollenin biosynthetic process	2	0.025446	1.59438	2.29826
9804	coumarin metabolic process	2	0.025446	1.59438	0.0121522
9805	coumarin biosynthetic process	2	0.025446	1.59438	0.0121522
43086	negative regulation of catalytic activity	7	0.025633	1.5912	1.52605
45165	cell fate commitment	5	0.027138	1.56642	4.30976
50789	regulation of biological process	120	0.027138	1.56642	0.433198
6073	cellular glucan metabolic process	10	0.027927	1.55398	-1.59438
51510	regulation of unidimensional cell growth	3	0.028503	1.54511	2.26969
48235	pollen sperm cell differentiation	3	0.028503	1.54511	1.9608
32504	multicellular organism reproduction	7	0.029935	1.52382	-0.13896
16053	organic acid biosynthetic process	20	0.031903	1.49617	0.850432
46394	carboxylic acid biosynthetic process	20	0.031903	1.49617	0.850432
44042	glucan metabolic process	10	0.032752	1.48476	-1.59438
6355	regulation of transcription, DNA-dependent	42	0.033524	1.47464	0.948598
31325	positive regulation of cellular metabolic process	8	0.034866	1.4576	-0.645024
9851	auxin biosynthetic process	4	0.034866	1.4576	0.956715
51252	regulation of RNA metabolic process	42	0.035011	1.4558	0.948598
60255	regulation of macromolecule metabolic process	77	0.035011	1.4558	0.640835
9725	response to hormone stimulus	40	0.035818	1.4459	0.709564
43193	positive regulation of gene-specific transcription	3	0.035818	1.4459	-0.103373
9911	positive regulation of flower development	5	0.037229	1.42912	-1.43443
9606	tropism	6	0.037229	1.42912	-2.00616
6098	pentose-phosphate shunt	4	0.039859	1.39947	0.0847772
9893	positive regulation of metabolic process	8	0.041743	1.37942	-0.645024
30154	cell differentiation	19	0.042498	1.37163	2.05129
9074	aromatic amino acid family catabolic process	2	0.042522	1.37139	2.27429
46713	boron transport	2	0.042522	1.37139	0.165459
15800	acidic amino acid transport	2	0.042522	1.37139	-1.42829
42402	cellular biogenic amine catabolic process	2	0.042522	1.37139	2.27429
15711	organic anion transport	2	0.042522	1.37139	-1.42829
46890	regulation of lipid biosynthetic process	3	0.043081	1.36571	-1.5079
22604	regulation of cell morphogenesis	3	0.043081	1.36571	2.26969
46271	phenylpropanoid catabolic process	3	0.043081	1.36571	-2.67332
46274	lignin catabolic process	3	0.043081	1.36571	-2.67332
65009	regulation of molecular function	11	0.043081	1.36571	0.951956
6740	NADPH regeneration	4	0.043151	1.36501	0.0847772
10193	response to ozone	4	0.043151	1.36501	-0.888271
9891	positive regulation of biosynthetic process	7	0.043151	1.36501	-0.645024
31328	positive regulation of cellular biosynthetic process	7	0.043151	1.36501	-0.645024
42221	response to chemical stimulus	77	0.044199	1.35459	-0.134688
9850	auxin metabolic process	5	0.048373	1.3154	0.956715
9888	tissue development	17	0.048794	1.31163	1.32833
9733	response to auxin stimulus	18	0.049893	1.30196	0.440793
F': Boechera stricta uninfected flowers. 'SL': Boechera stricta uninfected stems and leaves. aNumber of genes within found within the biological process. bP-value showing the significance for enrichment of genes within the biological process.
