# Supplementary material for: Major Transcriptome Reprogramming Underlies Floral Mimicry Induced by the Rust Fungus Puccinia monoica in Boechera stricta
Source: PLoS One. 2013 Sep 17;8(9):e75293. doi: 10.1371/journal.pone.0075293 (PMC3775748; doi:10.1371/journal.pone.0075293)
Supplement: Table S5 — Primer sequences used for qRT-PCR assay. (XLSX) [file pone.0075293.s005.xlsx]

## Sheet: primers_for_qRT-PCR
Gene ID	Gene name	Common name	Primer ID	5' ->3' sequence
At1g18070.1	ELONGATION FACTOR1 ALPHA	EF-1alpha	EF1a_F	CAGGCTGATTGTGCTGTTCTTA
			EF1a_R	GTTGTATCCGACCTTCTTCAGG
At1g53230.1	TEOSINTE BRANCHED, CYCLOIDEA, and PCF2	TCP3	TCP3_F	TCCGACGGCGATTCAATTCTA
			TCP3_R	GTGTTGACGAAGAGTATCGGC
At3g54720.1	ALTERED MERISTEM PROGRAMMING1	AMP1	AMP1_F	TGACGTTTCAGGGGGAGATGA
			AMP1_R	CCTACGTGGTCTCCAACCAGA
At4g08150.1	KNOTTED-LIKE1	KNAT1	KNAT1_F	CAATTCATGGAAGCATACTG
			KNAT1_R	GAGGATGTGAATGGGACTCTG
At1g65480.1	FLOWERING LOCUS T	FT	FT_F	CCTTTGGCAATGAGATTGTG
			FT_R	CGGGAAGGCCGAGATTGTA
At1g21460.1	SUGAR TRANSPORTER1	SWEET1	SWEET1_F	GACCCTTTTGTTGCAATCCC
			SWEET1_R	GGTCTTGCTTTCCATTAACC
At5g13170.1	SUGAR TRANSPORTER15	SWEET15	SWEET15_F	CATAGCGATTCCAAACGTGGT
			SWEET15_R	CCGATTCCGTCACAACTGGGT
At4g23590.1	TYROSINE TRANSAMINASE	TT	TT_F	TTGCCAAACGTGCTGTGGCGG
			TT_R	ACCATGTCCCATGGGAAGCC
